# Supplementary material for: Prognostic Value of Genotype-Phenotype Correlations in X-linked Myotubular Myopathy and Use of the Face2Gene Application as an Effective Non-Invasive Diagnostic Tool
Source: Preprints.org preprint supplement (doi:10.20944/preprints202311.0870.v1), 2023-11-14
Supplement: Supplementary file 3 [file Supplementary table.xlsx]

## Sheet: Cohort_together
Exon	Domain	Mutation type	gDNA	cDNA	Protein	Phenotype	No. of patients
ex2		missense		NM_000252.3:c.1A>G	NP_000243.1:p.(Met1Val)	Mo	1	Biancalana, 2003
ex2		Affects initiation codon		NM_000252.3:c.1A>T	NP_000243.1:p.Met1?	S	1	Annoussamy, 2019
ex2		missense		NM_000252.3:c.2T>G	NP_000243.1:p.(Met1Arg)	S	1	Patient 5 in Herman et al. [1999]
ex2		Affects initiation codon		NM_000252.3:c.2T>A	NP_000243.1:p.Met1?	S	1	Oliveira, 2013
ex2		nonsense		NM_000252.3:c.32C>G	NP_000243.1:p.(Ser11*)	S	3	Kress (2000?)	Oliveira, 2013	Annoussamy, 2019
ex2		frameshift (insertion)		NM_000252.3:c.48_49insA	NP_000243.1:p.(Glu17Argfs*4)	S	1	Biancalana, 2003
ex2		nonsense		NM_000252.3:c.49G>T	NP_000243.1:p.(Glu17*)	S	1	Laporte, 1997, Barth and Dubowitz, 1998
In2		splicing		NM_000252.3:c.63+1G>C		S	1	Lee, 2013
In2		splicing		NM_000252.3:c.63+2T>C		Mi	1	Patient 4 in Herman et al. [1999]
In2		splicing		NM_000252.3:c.63+2T>C		M	1	Annoussamy, 2019
In2		splicing		NM_000252.3:c.63+2T>G		S	1	Biancalana, 2003
In2		splicing		NM_000252.3:c.64-2A>G		S	1	Hermann, 2002
ex3		nonsense		NM_000252.3:c.70C>T	NP_000243.1:p.(Arg24*)	S	3	Biancalana, 2003	Tsai, 2005
ex3	PH-GRAM	nonsense		NM_000252.3:c.85C>T	NP_000243.1:p.(Arg29*)	S	4	Tanner, 1999	Hermann, 2002	Biancalana, 2003
ex3	PH-GRAM	deletion		NM_000252.3:c.98_103del	NP_000243.1:p.(Glu33_Ala34del)	S	1	Annoussamy, 2019
ex3	PH-GRAM	deletion		NM_000252.3:c.98_103del	NP_000243.1:p.(Glu33_Ala34del)	Mi	1	Fattori, 2015
ex3	PH-GRAM	frameshift (deletion)		NM_000252.3:c.99_105del	NP_000243.1:p.(Glu33Aspfs*9)	S	1	Annoussamy, 2019
ex3	PH-GRAM	frameshift (deletion)		NM_000252.3:c.106del	NP_000243.1:p.(Pro36Leufs*8)	S	1	Hermann, 2002
ex3	PH-GRAM	nonsense		NM_000252.3:c.109C>T	NP_000243.1:p.(Arg37*)	S	8	Laporte, 1997	Biancalana (2000?)	Buj-Bello, 1999	Biancalana, 2003	Tsai, 2005
ex3	PH-GRAM	nonsense		NM_000252.3:c.109C>T	NP_000243.1:p.(Arg37*)	Mo	1	Hermann, 2002
ex3	PH-GRAM	missense		NM_000252.3:c.122A>C	NP_000243.1:p.(Glu41Ala)	Mi	1	Fattori, 2015
In3		splicing		NM_000252.3:c.136+1G>A		S	1	Buj-Bello, 1999
In3		splicing		NM_000252.3:c.136+1G>C		S	1	Biancalana, 2003
In3		intronic		NM_000252.3:c.137-19_137-16del		S	1	Tanner, 1999
In3		intronic		NM_000252.3:c.137-11T>A		S	2	Tanner, 1999
In3		intronic		NM_000252.3:c.137-7T>G		Mo	1	Patient 6 in Herman et al. [1999]
In3		intronic		NM_000252.3:c.137-4_137-1del		S	1	Laporte, 1997
In3		intronic		NM_000252.3:c.137-4A>G		Mi	1	Tsai, 2005
In3		intronic		NM_000252.3:c.137-3T>A		S	1	Tanner, 1999
In3		splicing		NM_000252.3:c.137-2A>T		S	1	Buj-Bello, 1999
ex4	PH-GRAM	deletion		NM_000252.3:c.139_141del	NP_000243.1:p.(Lys47del)	S	4	Laporte, 1997	Liechti-Gallati (2000?)	Biancalana, 2003	Annoussamy, 2019
ex4	PH-GRAM	deletion		NM_000252.3:c.139_141del	NP_000243.1:p.(Lys47del)	Mo	1	Annoussamy, 2019
ex4	PH-GRAM	frameshift (deletion)		NM_000252.3:c.139_142del	NP_000243.1:p.(Glu48Leufs*24)	S	4	de Gouyon, 1997
ex4	PH-GRAM	frameshift (insertion)		NM_000252.3:c.141_142insG	NP_000243.1:p.(Glu48Glyfs*13)	S	1	Hermann, 2002
ex4	PH-GRAM	frameshift (deletion)		NM_000252.3:c.141_144del	NP_000243.1:p.(Glu48Leufs*24)	S	10	Tanner, 1999	Laporte, 1997	Biancalana (2000?)	Buj-Bello, 1999	Biancalana, 2003	Annoussamy, 2019
ex4	PH-GRAM	nonsense		NM_000252.3:c.142G>T	NP_000243.1:p.(Glu48*)	S	1	Tanner, 1999
ex4	PH-GRAM	nonsense		NM_000252.3:c.142G>T	NP_000243.1:p.(Glu48*)	Mo	1	Patient 12 in Herman et al. [1999]
ex4	PH-GRAM	frameshift (deletion)		NM_000252.3:c.142-143del	NP_000243.1:p.(Glu48Serfs*12)	S	1	de Carvalho Nunes, 2022
ex4	PH-GRAM	missense		NM_000252.3:c.145G>T	NP_000243.1:p.(Val49Phe)	S	1	Hermann, 2002
ex4	PH-GRAM	nonsense		NM_000252.3:c.181G>T	NP_000243.1:p.(Gly61*)	S	1	Hermann, 2002
ex4	PH-GRAM	nonsense		NM_000252.3:c.184A>T	NP_000243.1:p.(Arg62*)	S	1	Tsai, 2005
ex4	PH-GRAM	missense		NM_000252.3:c.185G>T	NP_000243.1:p.(Arg62Ile)	S	1	Longo, 2016
ex4	PH-GRAM	missense		NM_000252.3:c.194T>A	NP_000243.1:p.(Ile65Asn)	Mo	1	Annoussamy, 2019
ex4	PH-GRAM	missense		NM_000252.3:c.197C>G	NP_000243.1:p.(Thr66Arg)	S?	1	Dudzik, 2021
ex4	PH-GRAM	missense		NM_000252.3:c.202T>G	NP_000243.1:p.(Tyr68Asp)	Mo	1	Biancalana, 2003
ex4	PH-GRAM	missense		NM_000252.3:c.205C>T	NP_000243.1:p.(Arg69Cys)	Mi	3	de Gouyon, 1997	Hermann, 2002
ex4	PH-GRAM	missense		NM_000252.3:c.205C>T	NP_000243.1:p.(Arg69Cys)	M	6	Laporte, 2000	Annoussamy, 2019
ex4	PH-GRAM	missense		NM_000252.3:c.205C>T	NP_000243.1:p.(Arg69Cys)	Mo	1	Fattori, 2015
ex4	PH-GRAM	missense		NM_000252.3:c.205C>T	NP_000243.1:p.(Arg69Cys)	S	2	Annoussamy, 2019
ex4	PH-GRAM	missense		NM_000252.3:c.205C>A	NP_000243.1:p.(Arg69Ser)	S	1	Biancalana, 2003
ex4	PH-GRAM	missense		NM_000252.3:c.208C>T	NP_000243.1:p.(Leu70Phe)	Mi	1	Biancalana, 2003
ex4	PH-GRAM	missense		NM_000252.3:c.208C>T	NP_000243.1:p.(Leu70Phe)	M	2	Laporte, 2000	Annoussamy, 2019
ex4	PH-GRAM	frameshift (deletion)		NM_000252.3:c.212_215del	NP_000243.1:p.(Tyr71*)	S	1	Laporte, 1997, Vincent, 1998
ex4	PH-GRAM	frameshift (deletion)		NM_000252.3:c.230del	NP_000243.1:p.(Thr77Argfs*5)	S	1	Biancalana, 2003
In4		splicing		NM_000252.3:c.231+1G>T		S	1	Oliveira, 2013
In4		intronic		NM_000252.3:c.232-26_232-23del		M/Mo	1	Al-Hashim, 2017
In4		intronic		NM_000252.3:c.232-26_232-23del		S	1	Annoussamy, 2019
In4		intronic		NM_000252.3:c.232-3C>A		S	1	Hermann, 2002
In4		splicing		NM_000252.3:c.232-1G>A		S	1	Annoussamy, 2019
ex5	PH-GRAM	missense		NM_000252.3:c.260T>C	NP_000243.1:p.(Leu87Pro)	M	1	Laporte, 2000
ex5	PH-GRAM	frameshift (insertion)		NM_000252.3:c.286_287insA	NP_000243.1:p.(Asp78Glufs*7)	S	2	Tanner, 1999
ex5	PH-GRAM	nonsense		NM_000252.3:c.321T>A	NP_000243.1:p.(Tyr107*)	S	1	de Gouyon, 1997
ex5	PH-GRAM	missense		NM_000252.3:c.323G>A	NP_000243.1:p.(Gly108Asp)	Mi	1	Oliveira, 2013
In5		intronic		NM_000252.3:c.342+5G>A		S	1	Oliveira, 2013
ex6	PH-GRAM	frameshift (insertion)		NM_000252.3:c.377_378insT	NP_000243.1:p.(Glu126Aspfs*10)	S	1	Biancalana, 2003
ex6	PH-GRAM	frameshift (deletion)		NM_000252.3:c.391del	NP_000243.1:p.(Arg131Glufs*24)	S	2	Oberle, 1998	Kress (2000?)
ex6	PH-GRAM	frameshift (deletion)		NM_000252.3:c.392_396del	NP_000243.1:p.(Arg131Asnfs*3)	S	1	de Gouyon, 1997
ex6	PH-GRAM	frameshift (deletion)		NM_000252.3:c.397_398del	NP_000243.1:p.(Met133Valfs*2)	S	1	Laporte, 1997
ex6	PH-GRAM	silent		NM_000252.3:c.417A>G	NP_000243.1:p.(Arg139=)	S	1	Biancalana, 2003
ex6	PH-GRAM	silent		NM_000252.3:c.417A>G	NP_000243.1:p.(Arg139=)	Mi	1	Fattori, 2015
ex6	PH-GRAM	frameshift (deletion)		NM_000252.3:c.426del	NP_000243.1:p.(Leu144Trpfs*11)	S	1	Tanner, 1999
ex6	PH-GRAM	frameshift (deletion)		NM_000252.3:c.431del	NP_000243.1:p.(Leu144Argfs*11)	S	1	Chaudhari, 2009
ex6	PH-GRAM	frameshift (deletion)		NM_000252.3:c.438_439del	NP_000243.1:p.(His146Glnfs*10)	S	1	This study, 2023
In6		intronic		NM_000252.3:c.445-49_445-4del		S	1	Biancalana, 2003
In6		frameshift (insertion)		NM_000252.3:c.445-1_445insGAAA		S	1	Patient 19 in Herman et al. [1999]
ex7	PH-GRAM	frameshift (deletion/insertion)		NM_000252.3:c.461_477delinsAA	NP_000243.1:p.(Leu154*)	S	1	Laporte, 1997
ex7	PH-GRAM	frameshift (deletion)		NM_000252.3:c.465del	NP_000243.1:p.(Asn155Lysfs*29)	S	1	Hermann, 2002
ex7	PH-GRAM	nonsense		NM_000252.3:c.469G>T	NP_000243.1:p.(Glu157*)	S	1	Oliveira, 2013
ex7	PH-GRAM	frameshift (deletion)		NM_000252.3:c.469del	NP_000243.1:p.(Glu157Lysfs*29)	S	1	Hermann, 2002
ex7	PH-GRAM	frameshift (deletion)		NM_000252.3:c.473del	NP_000243.1:p.(Lys158Serfs*28)	S	1	Lee, 2013
ex7	RID	frameshift (deletion)		NM_000252.3:c.481del	NP_000243.1:p.(Val161Trpfs*25)	S	1	Tanner, 1999
ex7	RID	frameshift (duplication)		NM_000252.3:c.509_528dup	NP_000243.1:p.(Gly177Trpfs*16)	S	1	Oliveira, 2013
ex7	RID	frameshift (deletion)		NM_000252.3:c.520del	NP_000243.1:p.(Arg174Glyfs*12)	S	1	Annoussamy, 2019
ex7	RID	frameshift (insertion)		NM_000252.3:c.524_525insGG	NP_000243.1:p.(Gln176Glyfs*11)	S	1	Tsai, 2005
ex7	RID	nonsense		NM_000252.3:c.526C>T	NP_000243.1:p.(Gln176*)	S	1	Biancalana, 2003
ex7	RID	missense		NM_000252.3:c.527A>G	NP_000243.1:p.(Gln176Arg)	S	1	Nishikawa, 2019
In7		splicing		NM_000252.3:c.528+1G>A		S	5	Tsai, 2005	Laporte, 1997	Patient 18 in Herman et al. [1999]	Hermann, 2002	Biancalana, 2003
In7		splicing		NM_000252.3:c.529-1G>T		Mi	1	Vasli,2012
ex8	RID	frameshift (deletion)		NM_000252.3:c.534del	NP_000243.1:p.(Leu178Phefs*8)	S	1	Tsai, 2005
ex8	RID	missense		NM_000252.3:c.535C>T	NP_000243.1:p.(Pro179Ser)	M	1	Buj-Bello, 1999
ex8	RID	missense		NM_000252.3:c.535C>T	NP_000243.1:p.(Pro179Ser)	Mi	1	Hermann, 2002
ex8	RID	frameshift (insertion)		NM_000252.3:c.538_539insA	NP_000243.1:p.(Asn180Lysfs*10)	S	1	Laporte, 2000 (Novelli, 1999b)
ex8	RID	missense		NM_000252.3:c.540T>G	NP_000243.1:p.(Asn180Lys)	Mi (very)	1	Biancalana, 2003
ex8	RID	missense		NM_000252.3:c.550A>G	NP_000243.1:p.(Arg184Gly)	S	1	de Gouyon, 1997
ex8	RID	missense		NM_000252.3:c.551G>T	NP_000243.1:p.(Arg184Ile)	S	1	Biancalana, 2003
ex8	RID	missense		NM_000252.3:c.557C>T	NP_000243.1:p.(Thr186Ile)	?S	1	Hermann, 2002
ex8	RID	frameshift (deletion)		NM_000252.3:c.560_561del	NP_000243.1:p.(Phe187Tyrfs*2)	S	1	Laporte, 2000 (Häne and Schwartz, 1997)
ex8	RID	missense		NM_000252.3:c.566A>G	NP_000243.1:p.(Asn189Ser)	S	1	Laporte, 2000
ex8	RID	frameshift (deletion)		NM_000252.3:c.566del	NP_000243.1:p.(Asn189Ilefs*61)	S	1	Liechti-Gallati (2000?)
ex8	RID	deletion		NM_000252.3:c.567_569del	NP_000243.1:p.(Asn189del)	Mo	2	Annoussamy, 2019	Fattori, 2015
ex8	RID	missense		NM_000252.3:c.575A>G	NP_000243.1:p.(Tyr192Cys)	M	2	Annoussamy, 2019
ex8	RID	missense		NM_000252.3:c.575A>G	NP_000243.1:p.(Tyr192Cys)	Mi	1	Tosch, 2010
ex8	RID	frameshift (deletion)		NM_000252.3:c.589_592del	NP_000243.1:p.(Tyr198Leufs*51)	S	2	de Gouyon, 1997	Laporte, 1997
ex8	RID	missense		NM_000252.3:c.590C>T	NP_000243.1:p.(Thr197Ile)	S	1	Laporte, 2000 (Novelli, 1999b)
ex8	RID	missense		NM_000252.3:c.590C>T	NP_000243.1:p.(Thr197Ile)	Mi	1	Fattori, 2015
ex8	RID	missense		NM_000252.3:c.590C>T	NP_000243.1:p.(Thr197Ile)	Mo	1	Fattori, 2015
ex8	RID	missense		NM_000252.3:c.592T>A	NP_000243.1:p.(Tyr198Asn)	S	1	de Gouyon, 1997
ex8	RID	frameshift (insertion)		NM_000252.3:c.593_594insA	NP_000243.1:p.(Tyr198*)	S	2	Hermann, 2002	Biancalana, 2003
ex8	RID	nonsense		NM_000252.3:c.594C>A	NP_000243.1:p.(Tyr198*)	S	1	Tanner, 1999
ex8	RID	missense		NM_000252.3:c.595C>G	NP_000243.1:p.(Pro199Ala)	Mo	1	Nishikawa, 2019
ex8	RID	missense		NM_000252.3:c.595C>T	NP_000243.1:p.(Pro199Ser)	S	1	Annoussamy, 2019
ex8	RID	missense		NM_000252.3:c.596C>T	NP_000243.1:p.(Pro199Leu)	S	1	Tsai, 2005
ex8	RID	frameshift (insertion)		NM_000252.3:c.596_597insC	NP_000243.1:p.(Ala200Cysfs*12)	S	1	Oliveira, 2013
ex8	RID	frameshift (deletion)		NM_000252.3:c.601del	NP_000243.1:p.(Leu201Phefs*49)	S	1	Hermann, 2002
ex8	RID	missense		NM_000252.3:c.605T>C	NP_000243.1:p.(Leu202Ser)	S	1	Biancalana, 2003
ex8	RID	missense		NM_000252.3:c.614C>T	NP_000243.1:p.(Pro205Leu)	S	8	Tanner, 1999	Hermann, 2002	Biancalana, 2003	Tsai, 2005	Annoussamy, 2019
ex8	RID	missense		NM_000252.3:c.614C>T	NP_000243.1:p.(Pro205Leu)	Mi	1	Tsai, 2005
ex8	RID	missense		NM_000252.3:c.637C>T	NP_000243.1:p.(Leu213Phe)	Mi	1	Oliveira, 2013
ex8	RID	frameshift (insertion)		NM_000252.3:c.649_650insG	NP_000243.1:p.(Ala217Glyfs*4)	S	1	Laporte, 1997
ex8	RID	missense		NM_000252.3:c.659G>C	NP_000243.1:p.(Arg220Thr)	S	1	Oliveira, 2013
ex8	RID	nonsense		NM_000252.3:c.664C>T	NP_000243.1:p.(Arg222*)	S	3	Biancalana, 2003	Tsai, 2005
ex8	RID	nonsense		NM_000252.3:c.670C>T	NP_000243.1:p.(Arg224*)	S	5	Tanner, 1999	Laporte, 1997	Liechti-Gallati (2000?)	Laporte, 1997	Annoussamy, 2019
ex8	RID	missense		NM_000252.3:c.674T>C	NP_000243.1:p.(Ile225Thr)	S	2	Tanner, 1999	Buj-Bello, 1999
ex8	RID	missense		NM_000252.3:c.676C>A	NP_000243.1:p.(Pro226Thr)	M/Mo	1	Biancalana, 2003
ex8	RID	missense		NM_000252.3:c.676C>T	NP_000243.1:p.(Pro226Ser)	Mo	1	Annoussamy, 2019
in8		splicing		NM_000252.3:c.678+1del		S	1	Laporte, 1997
in8		splicing		NM_000252.3:c.678+1G>C		S	1	Kress (2000?)
in8		splicing		NM_000252.3:c.678+1G>A		S	1	Tanner, 1999
in8		splicing		NM_000252.3:c.678+2T>A		S	1	Tanner, 1999
in8		splicing		NM_000252.3:c.679-2A>G		S	1	Tsai, 2005
in8		splicing		NM_000252.3:c.679-1G>A		S	1	Laporte, 1997, Tanner 1998
ex9	RID	missense		NM_000252.3:c.679G>A	NP_000243.1:p.(Val227Met)	M	1	Biancalana (2000?)
ex9	RID	missense		NM_000252.3:c.679G>A	NP_000243.1:p.(Val227Met)	Mi	1	Hermann, 2002
ex9	RID	missense		NM_000252.3:c.679G>A	NP_000243.1:p.(Val227Met)	S	1	Annoussamy, 2019
ex9	RID	missense		NM_000252.3:c.683T>C	NP_000243.1:p.(Leu228Phe)	Mo	1	Hermann, 2002
ex9	RID	missense		NM_000252.3:c.685T>C	NP_000243.1:p.(Ser229Phe)	S	1	Laporte, 2000
ex9	RID	frameshift (deletion)		NM_000252.3:c.685del	NP_000243.1:p.(Ser229Hisfs*21)	S	1	Tsai, 2005
ex9	RID	missense		NM_000252.3:c.688T>A	NP_000243.1:p.(Trp230Arg)	S	1	Tsai, 2005
ex9	RID	missense		NM_000252.3:c.688T>C	NP_000243.1:p.(Trp230Arg)	S	1	Nishikawa, 2019
ex9	RID	nonsense		NM_000252.3:c.689G>A	NP_000243.1:p.(Trp230*)	S	1	Buj-Bello, 1999
ex9	RID	missense		NM_000252.3:c.690G>T	NP_000243.1:p.(Trp230Cys)	S	1	Tanner, 1999
ex9	RID	missense		NM_000252.3:c.695A>G	NP_000243.1:p.(His232Arg)	S	1	Tanner, 1999
ex9	RID	missense		NM_000252.3:c.695A>G	NP_000243.1:p.(His232Arg)	Mo	1	Annoussamy, 2019
ex9	RID	frameshift (deletion)		NM_000252.3:c.701_702del	NP_000243.1:p.(Asn235*)	S	1	Biancalana, 2003
ex9	RID	frameshift (insertion)		NM_000252.3:c.709_710insA	NP_000243.1:p.(Thr237Asnfs*19)	S	1	Laporte, 1997
ex9	RID	frameshift (insertion)		NM_000252.3:c.713_714insG	NP_000243.1:p.(Ile239Hisfs*17)	S	1	Buj-Bello, 1999
ex9	RID	missense		NM_000252.3:c.719T>A	NP_000243.1:p.(Val232Glu)	S	1	Longo, 2016
ex9	RID	missense		NM_000252.3:c.721C>T	NP_000243.1:p.(Arg241Cys)	S	3	Tanner, 1999	Annoussamy, 2019
ex9	RID	missense		NM_000252.3:c.721C>T	NP_000243.1:p.(Arg241Cys)	M	5	Buj-Bello, 1999	Donelly, 1998	Laporte, 1997	Kress (2000?)	Liechti-Gallati (2000?)
ex9	RID	missense		NM_000252.3:c.721C>T	NP_000243.1:p.(Arg241Cys)	Mi	4	Hermann, 2002	Biancalana, 2003
ex9	RID	missense		NM_000252.3:c.721C>T	NP_000243.1:p.(Arg241Cys)	Mo	1	Annoussamy, 2019
ex9	RID	missense		NM_000252.3:c.722G>T	NP_000243.1:p.(Arg241Leu)	S	1
ex9	RID	nonsense		NM_000252.3:c.757C>T	NP_000243.1:p.(Arg253*)	S	4	De Luca, 1999	Biancalana, 2003	Fattori, 2015	Savarese, 2016
ex9	RID	frameshift (deletion/insertion)		NM_000252.3:c.765_767delinsGG	NP_000243.1:p.(Asp256Valfs*28)	S	1	Oliveira, 2013
ex9	RID	frameshift (deletion)		NM_000252.3:c.765del	NP_000243.1:p.(Asp256Metfs*28)	S	1	Laporte, 1997
ex9	RID	frameshift (insertion)		NM_000252.3:c.787_788insTT	NP_000243.1:p.(Ile264Leufs*21)	S	1	Buj-Bello, 1999
ex9	RID	missense		NM_000252.3:c.791T>G	NP_000243.1:p.(Ile264Ser)	S	1	Buj-Bello, 1999
ex9	RID	nonsense		NM_000252.3:c.796G>T	NP_000243.1:p.(Glu266*)	S	1	Buj-Bello, 1999
ex9	PTP/DSP	missense		NM_000252.3:c.836C>G	NP_000243.1:p.(Ala279Gly)	S	1	Hermann, 2002
ex9	PTP/DSP	frameshift (deletion)		NM_000252.3:c.836del	NP_000243.1:p.(Ala279Glufs*5)	M	1	Laporte, 1997
in9		splicing		NM_000252.3:c.867+1G>C		S	1	Kimura, 1998
in9		intronic		NM_000252.3:c.868-13T>A		S	1	Tosch, 2010
ex10	PTP/DSP	frameshift (insertion)		NM_000252.3:c.873_874insG	NP_000243.1:p.(Gly293Argfs*4)	S	1	Kress (2000?)
ex10	PTP/DSP	deletion		NM_000252.3:c.880_882del	NP_000243.1:p.(Gly294del)	M	1	Buj-Bello, 1999
ex10	PTP/DSP	frameshift (insertion)		NM_000252.3:c.885_886insT	NP_000243.1:p.(Glu296*)	S	1	Biancalana, 2003
ex10	PTP/DSP	frameshift (deletion)		NM_000252.3:c.928_935del	NP_000243.1:p.(Asp310*)	S	1	Tanner, 1999
ex10	PTP/DSP	missense		NM_000252.3:c.950T>G	NP_000243.1:p.(Met317Arg)	Mi	1	de Gouyon, 1997
ex10	PTP/DSP	frameshift (insertion)		NM_000252.3:c.969_970insA	NP_000243.1:p.(Val324Serfs*8)	S	3	Kress (2000?)	Hermann, 2002	Biancalana, 2003
ex10	PTP/DSP	frameshift (insertion)		NM_000252.3:c.1015_1016insT	NP_000243.1:p.(Ser339Phefs*39)	S	1	Hermann, 2002
ex10	PTP/DSP	missense		NM_000252.3:c.1037G>C	NP_000243.1:p.(Trp346Ser)	M	1	Biancalana (2000?)
ex10	PTP/DSP	missense		NM_000252.3:c.1038G>T	NP_000243.1:p.(Trp346Cys)	Mi	1	Biancalana, 2003
In10		splicing		NM_000252.3:c.1054-2A>G		S	1	Annoussamy, 2019
In10		splicing		NM_000252.3:c.1054-1G>T		S	1	Tanner, 1999
ex11	PTP/DSP	missense		NM_000252.3:c.1067G>A	NP_000243.1:p.(Gly356Glu)	S	1	Tsai, 2005
ex11	PTP/DSP	frameshift (insertion)		NM_000252.3:c.1083_1084insA	NP_000243.1:p.(Asp362Argfs*16)	S	1	Biancalana, 2003
ex11	PTP/DSP	frameshift (deletion)		NM_000252.3:c.1088_1089del	NP_000243.1:p.(Lys363Serfs*14)	S	1	Oliveira, 2013
ex11	PTP/DSP	nonsense		NM_000252.3:c.1097C>G	NP_000243.1:p.(Ser366*)	S	1	Tanner, 1999
ex11	PTP/DSP	missense		NM_000252.3:c.1120C>G	NP_000243.1:p.(His374Asp)	S	1	Kress (2000?)
ex11	PTP/DSP	missense		NM_000252.3:c.1127G>A	NP_000243.1:p.(Ser376Asn)	S	1	Laporte, 1996
ex11	PTP/DSP	frameshift (insertion)		NM_000252.3:c.1131_1132insGGAT	NP_000243.1:p.(Asp380Metfs*17)	S	1	Nishino, 1998
ex11	PTP/DSP	missense		NM_000252.3:c.1132G>A	NP_000243.1:p.(Gly378Arg)	S	3	Laporte, 1996	Buj-Bello, 1999	Hermann, 2002
ex11	PTP/DSP	missense		NM_000252.3:c.1133G>A	NP_000243.1:p.(Gly378Glu)	S	1	Laporte, 2000 (Häne and Schwartz, 1997)
ex11	PTP/DSP	nonsense		NM_000252.3:c.1137G>A	NP_000243.1:p.(Trp379*)	S	1	Kress (2000?)
ex11	PTP/DSP	nonsense		NM_000252.3:c.1150C>T	NP_000243.1:p.(Gln384*)	S	1	Savarese, 2016
ex11	PTP/DSP	missense		NM_000252.3:c.1160C>T	NP_000243.1:p.(Ser387Phe)	S	1	Tsai, 2005
ex11	PTP/DSP	missense		NM_000252.3:c.1166C>A	NP_000243.1:p.(Ala389Asp)	S	1	Biancalana, 2003
ex11	PTP/DSP	frameshift (insertion)		NM_000252.3:c.1179_1180insGTTG	NP_000243.1:p.(Asp394Valfs*3)	S	1	Laporte, 1997
ex11	PTP/DSP	missense		NM_000252.3:c.1190A>G	NP_000243.1:p.(Tyr397Cys)	S	5	de Gouyon, 1997	Laporte, 1997	Kress (2000?)	Hermann, 2002	Gangfuss, 2021
ex11	PTP/DSP	missense		NM_000252.3:c.1204G>A	NP_000243.1:p.(Gly402Arg)	S	2	Tanner, 1999	Hermann, 2002
ex11	PTP/DSP	missense		NM_000252.3:c.1205G>T	NP_000243.1:p.(Gly402Val)	S	1	Nishino, 1998
ex11	PTP/DSP	missense		NM_000252.3:c.1210G>A	NP_000243.1:p.(Glu404Lys)	Mi	3	de Gouyon, 1997	Hoffjan, 2006	Fattori, 2015
ex11	PTP/DSP	missense		NM_000252.3:c.1210G>A	NP_000243.1:p.(Glu404Lys)	Mi (very)	1	Hoffjan, 2006
ex11	PTP/DSP	missense		NM_000252.3:c.1210G>A	NP_000243.1:p.(Glu404Lys)	M	1	Annoussamy, 2019
ex11	PTP/DSP	nonsense		NM_000252.3:c.1210G>T	NP_000243.1:p.(Glu404*)	M	1	Annoussamy, 2019
ex11	PTP/DSP	missense		NM_000252.3:c.1217T>C	NP_000243.1:p.(Leu406Pro)	S	1	de Gouyon, 1997
ex11	PTP/DSP	missense		NM_000252.3:c.1223A>C	NP_000243.1:p.(Gln408Pro)	S	1	Tsai, 2005
ex11	PTP/DSP	missense		NM_000252.3:c.1233G>C	NP_000243.1:p.(Trp411Cys)	M	1	Liechti-Gallati (2000?)
ex11	PTP/DSP	missense		NM_000252.3:c.1233G>T	NP_000243.1:p.(Trp411Cys)	M	1	Annoussamy, 2019
ex11	PTP/DSP	missense		NM_000252.3:c.1244G>T	NP_000243.1:p.(Gly415Val)	S	1	Tsai, 2005
ex11	PTP/DSP	missense		NM_000252.3:c.1247A>G	NP_000243.1:p.(His416Arg)	S	1	Oliveira, 2013
in11		splicing		NM_000252.3:c.1260+1G>C		S	1	Laporte, 1997
in11		intronic		NM_000252.3:c.1261-10A>G		S	27	Tsai, 2005	Gangfuss, 2021	Tanner, 1999	Laporte, 1997	Liechti-Gallati (2000?)	Buj-Bello, 1999	Watanabe, 1998	Nishino, 1998	Hermann, 2002	Biancalana, 2003	Fattori, 2015	de Gouyon, 1997
ex12	PTP/DSP	nonsense		NM_000252.3:c.1261C>T	NP_000243.1:p.(Arg421*)	S	6	de Gouyon, 1997	Tanner, 1999	Nishino, 1998	Hermann, 2002
ex12	PTP/DSP	missense		NM_000252.3:c.1262G>A	NP_000243.1:p.(Arg421Gln)	S	7	de Gouyon, 1997	Laporte, 1997	Kress (2000?)	Liechti-Gallati (2000?)	Hermann, 2002	Biancalana, 2003	Longo, 2016
ex12	PTP/DSP	missense		NM_000252.3:c.1262G>A	NP_000243.1:p.(Arg421Gln)	M	1	Kress (2000?)
ex12	PTP/DSP	frameshift (duplication)		NM_000252.3:c.1264dupA	NP_000243.1:p.(Ile422Asnfs*5)	S	1	Annoussamy, 2019
ex12	PTP/DSP SID	nonsense		NM_000252.3:c.1318C>T	NP_000243.1:p.(Gln440*)	S	1	Oliveira, 2013
ex12	PTP/DSP SID	frameshift (deletion/insertion)		NM_000252.3:c.1319_1321delinsTA	NP_000243.1:p.(Gln440Leufs*24)	S	1	Oliveira, 2013
ex12	PTP/DSP SID	frameshift (deletion)		NM_000252.3:c.1328_1331del	NP_000243.1:p.(Asp443Valfs*20)	S	1	Oliveira, 2013
ex12	PTP/DSP SID	missense		NM_000252.3:c.1331G>A	NP_000243.1:p.(Cys444Tyr)	S	1	Tanner, 1999
ex12	PTP/DSP SID	frameshift (deletion)		NM_000252.3:c.1333_1345del	NP_000243.1:p.(Val445Glnfs*15)	S	1	Buj-Bello, 1999
ex12	PTP/DSP SID	nonsense		NM_000252.3:c.1338G>A	NP_000243.1:p.(Trp446*)	S	1	Tanner, 1999
ex12	PTP/DSP SID	nonsense		NM_000252.3:c.1346C>G	NP_000243.1:p.(Ser449*)	S	1	Tanner, 1999
in12		splicing		NM_000252.3:c.1353+1G>C		S	1	Tanner, 1999
in12		splicing		NM_000252.3:c.1353+1G>A		S	2	Tanner, 1999	Hermann, 2002
in12		splicing		NM_000252.3:c.1354-1G>A		Mo	1	Patient 33 in Herman et al. [1999
ex13	PTP/DSP SID	frameshift (deletion/insertion)		NM_000252.3:c.1381_1382delinsTA	NP_000243.1:p.(Gln461*)	S	1	Fattori, 2015
ex13	PTP/DSP SID	insertion		NM_000252.3:c.1388_1389insN[376]	NP_000243.1:p.(Phe452_Gln489)del	S	1	Oliveira, 2013
ex13	PTP/DSP SID	missense		NM_000252.3:c.1405C>G	NP_000243.1:p.(His469Asp)	M/Mo	1	Zhao, 2018
ex13	PTP/DSP SID	missense		NM_000252.3:c.1406A>C	NP_000243.1:p.(His469Pro)	S	1	Laporte, 1997
ex13	PTP/DSP SID	missense		NM_000252.3:c.1409T>C	NP_000243.1:p.(Leu470Pro)	S	1	Biancalana, 2003
ex13	SID	nonsense		NM_000252.3:c.1420C>T	NP_000243.1:p.(Arg474*)	S	7	Laporte, 1997	Hermann, 2002	Fattori, 2015	Annoussamy, 2019	Funayama, 2019
ex13	SID	deletion		NM_000252.3:c.1432_1434del	NP_000243.1:p.(Phe478del)	S	1	Biancalana, 2003
ex13	SID	frameshift (deletion)		NM_000252.3:c.1433_1436del	NP_000243.1:p.(Phe478Tyrfs*23)	S	2	Tanner, 1999	Nishino, 1998
ex13	SID	missense		NM_000252.3:c.1441A>T	NP_000243.1:p.(Asn481Tyr)	Mi	1	Biancalana, 2003
ex13	SID	frameshift (deletion)		NM_000252.3:c.1449_1449del	NP_000243.1:p.(Glu483Aspfs*19)	S	1	Tanner, 1999
ex13	SID	nonsense		NM_000252.3:c.1456C>T	NP_000243.1:p.(Arg486*)	S	3	Tanner, 1999	Patient 32 in Herman et al. [1999]	Tsai, 2005
ex13		frameshift (deletion)		NM_000252.3:c.1464_1467del	NP_000243.1:p.(Gln489Argfs*?)	S	1	Buj-Bello, 1999
in13		intronic		NM_000252.3:c.1467+5G>A		Mi	1	Tsai, 2005
in13		splicing		NM_000252.3:c.1467+1G>A		S	1	Hermann, 2002
in13		splicing		NM_000252.3:c.1467+1G>T		S	1	Fidani, 2011
in13		intronic		NM_000252.3:c.1468-577A>G		S?	2	Bryen, 2021	Fitzgerald, 2020
		frameshift (deletion)		NM_000252.3:c.1481del	NP_000243.1:p.(Thr495Leufs*7)	Mi	1	Fattori, 2015
ex14		missense		NM_000252.3:c.1490C>A	NP_000243.1:p.(Ser497Tyr)	Mo	1	Annoussamy, 2019
ex14		missense		NM_000252.3:c.1495T>C	NP_000243.1:p.(Trp499Arg)	Mi	1	de Gouyon, 1997
ex14		missense		NM_000252.3:c.1496G>T	NP_000243.1:p.(Trp499Leu)	M	1	Annoussamy, 2019
ex14		missense		NM_000252.3:c.1505T>A	NP_000243.1:p.(Ile502Lys)	S	2	Annoussamy, 2019
ex14		frameshift (deletion)		NM_000252.3:c.1509_1510del	NP_000243.1:p.(Asn503Lysfs*2)	S	1	Oliveira, 2013
ex14		frameshift (deletion)		NM_000252.3:c.1519_1522del	NP_000243.1:p.(Glu507Asnfs*28)	S	1	Oliveira, 2013
ex14		deletion		NM_000252.3:c.1530_1541del	NP_000243.1:p.(Lys510_Tyr514delinsAsn)	S	1	Buj-Bello, 1999
ex14		nonsense		NM_000252.3:c.1549G>T	NP_000243.1:p.(Glu517*)	S	1	Liechti-Gallati (2000?)
ex14		nonsense		NM_000252.3:c.1558C>T	NP_000243.1:p.(Arg520*)	M	2	Kress (2000?)
ex14		nonsense		NM_000252.3:c.1558C>T	NP_000243.1:p.(Arg520*)	S	1	Savarese, 2016
ex14		frameshift (insertion)		NM_000252.3:c.1579_1580insC	NP_000243.1:p.(Ser527Thrfs*14)	S	1	Buj-Bello, 1999
ex14		frameshift (deletion)		NM_000252.3:c.1594_1594del	NP_000243.1:p.(Glu532Asnfs*4)	S	1	Tanner, 1999
ex14		missense		NM_000252.3:c.1600T>C	NP_000243.1:p.(Trp534Arg)	S	1	Oliveira, 2013
ex14		nonsense		NM_000252.3:c.1611C>G	NP_000243.1:p.(Tyr537*)	S	1	Biancalana, 2003
in14		intronic		NM_000252.3:c.1644+3_1644+6del		S	2	Tanner, 1999	Tosch, 2010
in14		intronic		NM_000252.3:c.1644+8_1644+11del		S	1	Biancalana, 2003
ex15		frameshift (deletion)		NM_000252.3:c.1789del	NP_000243.1:p.(His598Metfs*?)	Mi	1	Patient 35 in Herman et al. [1999]
ex1-13		Large deletion	NC_000023.11:g.(?_150568620)_(150660485_150663432)del		NP_000243.1:p.0?	S	1	Hu, 1996b, Laporte 1997
ex1-7		Large deletion	NC_000023.11:g.(?_150568620)_(150639027_150641268)del		NP_000243.1:p.0?	S	1	Hermann, 1999
ex1-6		Large deletion	NC_000023.11:g.(?_150568620)_(150619140_150638942)del		NP_000243.1:p.0?	S	1	Fattori, 2015
ex1		Large deletion	NC_000023.11:g.(?_150568620)_(?_150592604)del		NP_000243.1:p.0?	S	5	Hermann, 1999, 2002, Tanner 1999
ex2		Large deletion	NC_000023.11:g.(150568663_150592604)_(X:150592678_150596497)del		NP_000243.1:p.0?	S	1	Tanner, 1999
ex2-6		Large deletion	NC_000023.11:g.(150568663_150592604)_(X:150619140_150638942)del		NP_000243.1:p.0?	S	1	Tanner, 1999
ex4		large deletion		NM_000252.3:c.(136+1_137-1)_(231+1_232-1)del	NP_000243.1:p.Asp46Glyfs*6	S	1	Tanner, 1999
ex5		Large deletion		NM_000252.3:c.(231+1_232-1)_(342+1_343-1)del	NP_000243.1:p.(Ser79_Asp115del)	S	2	Biancalana, 2003	Annoussamy, 2019
ex5,6		Large deletion		NM_000252.3:c.(231+1_232-1)_(444+1_445-1)del	NP_000243.1:p.(Asp78_Leu148del)	S	1	de Gouyon, 1997
ex6-11		Large deletion		NM_000252.3:c.(342+1_343-1_(1260+1_1261-1)del	NP_000243.1:p.(Asp115_Ser420del)	S	1	de Gouyon, 1997
ex6		Large deletion		NM_000252.3:c.(342+1_343-1)_(444+1_445-1)del	NP_000243.1:p.(Asp115_Leu148del)	S	1	This study, 2023
ex8		Large deletion		NM_000252.3:c.(528+1_527-1)_(678+1_679-1)del	NP_000243.1:p.(Gly177_Pro226del)	S	1	Biancalana, 2003
ex9		Large deletion		NM_000252.3:c.(678+1_679-1)_(867+1_868-1)del	NP_000243.1:p.(Val227_Lys289del)	S	1	Tsai, 2005
ex10		Large deletion		NM_000252.3:c.(867+1_868-1)_(1053+1_1054-1)del	NP_000243.1:p.(Ala290_Lys351del)	S	1	Biancalana, 2003
ex11-13		Large deletion		NM_000252.3:c.(1053+1_1054-1)_(1467+1_1486-1)del	NP_000243.1:p.(Leu352_Gln489del)	S	1	This study, 2023
ex11-15		Large deletion	NC_000023.11:g.(150649902_150657820)_(150673144_?)del		NP_000243.1:p.?	S	1	Annoussamy, 2019
ex13		Large deletion		NM_000252.3:c.1354-26_1354+92del	NP_000243.1:p.(Phe452_Gln489del)	S	1	Hermann, 2002
ex15		Large deletion	NC_000023.11:g.(150663610_150671427)_(150673144_?)del		NP_000243.1:p.?	Mi	1	Tanner, 1999
MTM1		Large deletion	NC_000023.11:g.(?_150568620)_(150673144_?)del			S	5	Hue, 1996b, Laporte, 1997	Bartsch, 1999	Biancalana, 2003	Tsai, 2005	Annoussamy, 2019
Xq28		Large deletion	interstitial deletion at Xq28			S	1	Savarese, 2016

## Sheet: Cohort_by one
Exon	Domain	Mutation type	gDNA	cDNA	Protein	Phenotype
ex2		missense		NM_000252.3:c.1A>G	NP_000243.1:p.(Met1Val)	Mo	Biancalana, 2003
ex2		Affects initiation codon		NM_000252.3:c.1A>T	NP_000243.1:p.Met1?	S	Annoussamy, 2019
ex2		missense		NM_000252.3:c.2T>G	NP_000243.1:p.(Met1Arg)	S	Patient 5 in Herman et al. [1999]
ex2		Affects initiation codon		NM_000252.3:c.2T>A	NP_000243.1:p.Met1?	S	Oliveira, 2013
ex2		nonsense		NM_000252.3:c.32C>G	NP_000243.1:p.(Ser11*)	S	Kress (2000?)	Oliveira, 2013	Annoussamy, 2019
ex2		nonsense		NM_000252.3:c.32C>G	NP_000243.1:p.(Ser11*)	S	Kress (2000?)	Oliveira, 2013	Annoussamy, 2019
ex2		nonsense		NM_000252.3:c.32C>G	NP_000243.1:p.(Ser11*)	S	Kress (2000?)	Oliveira, 2013	Annoussamy, 2019
ex2		frameshift (insertion)		NM_000252.3:c.48_49insA	NP_000243.1:p.(Glu17Argfs*4)	S	Biancalana, 2003
ex2		nonsense		NM_000252.3:c.49G>T	NP_000243.1:p.(Glu17*)	S	Laporte, 1997, Barth and Dubowitz, 1998
In2		splicing		NM_000252.3:c.63+1G>C		S	Lee, 2013
In2		splicing		NM_000252.3:c.63+2T>C		Mi	Patient 4 in Herman et al. [1999]
In2		splicing		NM_000252.3:c.63+2T>C		M	Annoussamy, 2019
In2		splicing		NM_000252.3:c.63+2T>G		S	Biancalana, 2003
In2		splicing		NM_000252.3:c.64-2A>G		S	Hermann, 2002
ex3		nonsense		NM_000252.3:c.70C>T	NP_000243.1:p.(Arg24*)	S	Biancalana, 2003	Tsai, 2005
ex3		nonsense		NM_000252.3:c.70C>T	NP_000243.1:p.(Arg24*)	S	Biancalana, 2003	Tsai, 2005
ex3		nonsense		NM_000252.3:c.70C>T	NP_000243.1:p.(Arg24*)	S	Biancalana, 2003	Tsai, 2005
ex3	PH-GRAM	nonsense		NM_000252.3:c.85C>T	NP_000243.1:p.(Arg29*)	S	Tanner, 1999	Hermann, 2002	Biancalana, 2003
ex3	PH-GRAM	nonsense		NM_000252.3:c.85C>T	NP_000243.1:p.(Arg29*)	S	Tanner, 1999	Hermann, 2002	Biancalana, 2003
ex3	PH-GRAM	nonsense		NM_000252.3:c.85C>T	NP_000243.1:p.(Arg29*)	S	Tanner, 1999	Hermann, 2002	Biancalana, 2003
ex3	PH-GRAM	nonsense		NM_000252.3:c.85C>T	NP_000243.1:p.(Arg29*)	S	Tanner, 1999	Hermann, 2002	Biancalana, 2003
ex3	PH-GRAM	deletion		NM_000252.3:c.98_103del	NP_000243.1:p.(Glu33_Ala34del)	S	Annoussamy, 2019
ex3	PH-GRAM	deletion		NM_000252.3:c.98_103del	NP_000243.1:p.(Glu33_Ala34del)	Mi	Fattori, 2015
ex3	PH-GRAM	frameshift (deletion)		NM_000252.3:c.99_105del	NP_000243.1:p.(Glu33Aspfs*9)	S	Annoussamy, 2019
ex3	PH-GRAM	frameshift (deletion)		NM_000252.3:c.106del	NP_000243.1:p.(Pro36Leufs*8)	S	Hermann, 2002
ex3	PH-GRAM	nonsense		NM_000252.3:c.109C>T	NP_000243.1:p.(Arg37*)	S	Laporte, 1997	Biancalana (2000?)	Buj-Bello, 1999	Biancalana, 2003	Tsai, 2005
ex3	PH-GRAM	nonsense		NM_000252.3:c.109C>T	NP_000243.1:p.(Arg37*)	S	Laporte, 1997	Biancalana (2000?)	Buj-Bello, 1999	Biancalana, 2003	Tsai, 2005
ex3	PH-GRAM	nonsense		NM_000252.3:c.109C>T	NP_000243.1:p.(Arg37*)	S	Laporte, 1997	Biancalana (2000?)	Buj-Bello, 1999	Biancalana, 2003	Tsai, 2005
ex3	PH-GRAM	nonsense		NM_000252.3:c.109C>T	NP_000243.1:p.(Arg37*)	S	Laporte, 1997	Biancalana (2000?)	Buj-Bello, 1999	Biancalana, 2003	Tsai, 2005
ex3	PH-GRAM	nonsense		NM_000252.3:c.109C>T	NP_000243.1:p.(Arg37*)	S	Laporte, 1997	Biancalana (2000?)	Buj-Bello, 1999	Biancalana, 2003	Tsai, 2005
ex3	PH-GRAM	nonsense		NM_000252.3:c.109C>T	NP_000243.1:p.(Arg37*)	S	Laporte, 1997	Biancalana (2000?)	Buj-Bello, 1999	Biancalana, 2003	Tsai, 2005
ex3	PH-GRAM	nonsense		NM_000252.3:c.109C>T	NP_000243.1:p.(Arg37*)	S	Laporte, 1997	Biancalana (2000?)	Buj-Bello, 1999	Biancalana, 2003	Tsai, 2005
ex3	PH-GRAM	nonsense		NM_000252.3:c.109C>T	NP_000243.1:p.(Arg37*)	S	Laporte, 1997	Biancalana (2000?)	Buj-Bello, 1999	Biancalana, 2003	Tsai, 2005
ex3	PH-GRAM	nonsense		NM_000252.3:c.109C>T	NP_000243.1:p.(Arg37*)	Mo	Hermann, 2002
ex3	PH-GRAM	missense		NM_000252.3:c.122A>C	NP_000243.1:p.(Glu41Ala)	Mi	Fattori, 2015
In3		splicing		NM_000252.3:c.136+1G>A		S	Buj-Bello, 1999
In3		splicing		NM_000252.3:c.136+1G>C		S	Biancalana, 2003
In3		intronic		NM_000252.3:c.137-19_137-16del		S	Tanner, 1999
In3		intronic		NM_000252.3:c.137-11T>A		S	Tanner, 1999
In3		intronic		NM_000252.3:c.137-11T>A		S	Tanner, 1999
In3		intronic		NM_000252.3:c.137-7T>G		Mo	Patient 6 in Herman et al. [1999]
In3		intronic		NM_000252.3:c.137-4_137-1del		S	Laporte, 1997
In3		intronic		NM_000252.3:c.137-4A>G		Mi	Tsai, 2005
In3		intronic		NM_000252.3:c.137-3T>A		S	Tanner, 1999
In3		splicing		NM_000252.3:c.137-2A>T		S	Buj-Bello, 1999
ex4	PH-GRAM	deletion		NM_000252.3:c.139_141del	NP_000243.1:p.(Lys47del)	S	Laporte, 1997	Liechti-Gallati (2000?)	Biancalana, 2003	Annoussamy, 2019
ex4	PH-GRAM	deletion		NM_000252.3:c.139_141del	NP_000243.1:p.(Lys47del)	S	Laporte, 1997	Liechti-Gallati (2000?)	Biancalana, 2003	Annoussamy, 2019
ex4	PH-GRAM	deletion		NM_000252.3:c.139_141del	NP_000243.1:p.(Lys47del)	S	Laporte, 1997	Liechti-Gallati (2000?)	Biancalana, 2003	Annoussamy, 2019
ex4	PH-GRAM	deletion		NM_000252.3:c.139_141del	NP_000243.1:p.(Lys47del)	S	Laporte, 1997	Liechti-Gallati (2000?)	Biancalana, 2003	Annoussamy, 2019
ex4	PH-GRAM	deletion		NM_000252.3:c.139_141del	NP_000243.1:p.(Lys47del)	Mo	Annoussamy, 2019
ex4	PH-GRAM	frameshift (deletion)		NM_000252.3:c.139_142del	NP_000243.1:p.(Glu48Leufs*24)	S	de Gouyon, 1997
ex4	PH-GRAM	frameshift (deletion)		NM_000252.3:c.139_142del	NP_000243.1:p.(Glu48Leufs*24)	S	de Gouyon, 1997
ex4	PH-GRAM	frameshift (deletion)		NM_000252.3:c.139_142del	NP_000243.1:p.(Glu48Leufs*24)	S	de Gouyon, 1997
ex4	PH-GRAM	frameshift (deletion)		NM_000252.3:c.139_142del	NP_000243.1:p.(Glu48Leufs*24)	S	de Gouyon, 1997
ex4	PH-GRAM	frameshift (insertion)		NM_000252.3:c.141_142insG	NP_000243.1:p.(Glu48Glyfs*13)	S	Hermann, 2002
ex4	PH-GRAM	frameshift (deletion)		NM_000252.3:c.141_144del	NP_000243.1:p.(Glu48Leufs*24)	S	Tanner, 1999	Laporte, 1997	Biancalana (2000?)	Buj-Bello, 1999	Biancalana, 2003	Annoussamy, 2019
ex4	PH-GRAM	frameshift (deletion)		NM_000252.3:c.141_144del	NP_000243.1:p.(Glu48Leufs*24)	S	Tanner, 1999	Laporte, 1997	Biancalana (2000?)	Buj-Bello, 1999	Biancalana, 2003	Annoussamy, 2019
ex4	PH-GRAM	frameshift (deletion)		NM_000252.3:c.141_144del	NP_000243.1:p.(Glu48Leufs*24)	S	Tanner, 1999	Laporte, 1997	Biancalana (2000?)	Buj-Bello, 1999	Biancalana, 2003	Annoussamy, 2019
ex4	PH-GRAM	frameshift (deletion)		NM_000252.3:c.141_144del	NP_000243.1:p.(Glu48Leufs*24)	S	Tanner, 1999	Laporte, 1997	Biancalana (2000?)	Buj-Bello, 1999	Biancalana, 2003	Annoussamy, 2019
ex4	PH-GRAM	frameshift (deletion)		NM_000252.3:c.141_144del	NP_000243.1:p.(Glu48Leufs*24)	S	Tanner, 1999	Laporte, 1997	Biancalana (2000?)	Buj-Bello, 1999	Biancalana, 2003	Annoussamy, 2019
ex4	PH-GRAM	frameshift (deletion)		NM_000252.3:c.141_144del	NP_000243.1:p.(Glu48Leufs*24)	S	Tanner, 1999	Laporte, 1997	Biancalana (2000?)	Buj-Bello, 1999	Biancalana, 2003	Annoussamy, 2019
ex4	PH-GRAM	frameshift (deletion)		NM_000252.3:c.141_144del	NP_000243.1:p.(Glu48Leufs*24)	S	Tanner, 1999	Laporte, 1997	Biancalana (2000?)	Buj-Bello, 1999	Biancalana, 2003	Annoussamy, 2019
ex4	PH-GRAM	frameshift (deletion)		NM_000252.3:c.141_144del	NP_000243.1:p.(Glu48Leufs*24)	S	Tanner, 1999	Laporte, 1997	Biancalana (2000?)	Buj-Bello, 1999	Biancalana, 2003	Annoussamy, 2019
ex4	PH-GRAM	frameshift (deletion)		NM_000252.3:c.141_144del	NP_000243.1:p.(Glu48Leufs*24)	S	Tanner, 1999	Laporte, 1997	Biancalana (2000?)	Buj-Bello, 1999	Biancalana, 2003	Annoussamy, 2019
ex4	PH-GRAM	frameshift (deletion)		NM_000252.3:c.141_144del	NP_000243.1:p.(Glu48Leufs*24)	S	Tanner, 1999	Laporte, 1997	Biancalana (2000?)	Buj-Bello, 1999	Biancalana, 2003	Annoussamy, 2019
ex4	PH-GRAM	nonsense		NM_000252.3:c.142G>T	NP_000243.1:p.(Glu48*)	S	Tanner, 1999
ex4	PH-GRAM	nonsense		NM_000252.3:c.142G>T	NP_000243.1:p.(Glu48*)	Mo	Patient 12 in Herman et al. [1999]
ex4	PH-GRAM	frameshift (deletion)		NM_000252.3:c.142-143del	NP_000243.1:p.(Glu48Serfs*12)	S	de Carvalho Nunes, 2022
ex4	PH-GRAM	missense		NM_000252.3:c.145G>T	NP_000243.1:p.(Val49Phe)	S	Hermann, 2002
ex4	PH-GRAM	nonsense		NM_000252.3:c.181G>T	NP_000243.1:p.(Gly61*)	S	Hermann, 2002
ex4	PH-GRAM	nonsense		NM_000252.3:c.184A>T	NP_000243.1:p.(Arg62*)	S	Tsai, 2005
ex4	PH-GRAM	missense		NM_000252.3:c.185G>T	NP_000243.1:p.(Arg62Ile)	S	Longo, 2016
ex4	PH-GRAM	missense		NM_000252.3:c.194T>A	NP_000243.1:p.(Ile65Asn)	Mo	Annoussamy, 2019
ex4	PH-GRAM	missense		NM_000252.3:c.197C>G	NP_000243.1:p.(Thr66Arg)	S?	Dudzik, 2021
ex4	PH-GRAM	missense		NM_000252.3:c.202T>G	NP_000243.1:p.(Tyr68Asp)	Mo	Biancalana, 2003
ex4	PH-GRAM	missense		NM_000252.3:c.205C>T	NP_000243.1:p.(Arg69Cys)	Mi	de Gouyon, 1997	Hermann, 2002
ex4	PH-GRAM	missense		NM_000252.3:c.205C>T	NP_000243.1:p.(Arg69Cys)	Mi	de Gouyon, 1997	Hermann, 2002
ex4	PH-GRAM	missense		NM_000252.3:c.205C>T	NP_000243.1:p.(Arg69Cys)	Mi	de Gouyon, 1997	Hermann, 2002
ex4	PH-GRAM	missense		NM_000252.3:c.205C>T	NP_000243.1:p.(Arg69Cys)	M	Laporte, 2000	Annoussamy, 2019
ex4	PH-GRAM	missense		NM_000252.3:c.205C>T	NP_000243.1:p.(Arg69Cys)	M	Laporte, 2000	Annoussamy, 2019
ex4	PH-GRAM	missense		NM_000252.3:c.205C>T	NP_000243.1:p.(Arg69Cys)	M	Laporte, 2000	Annoussamy, 2019
ex4	PH-GRAM	missense		NM_000252.3:c.205C>T	NP_000243.1:p.(Arg69Cys)	M	Laporte, 2000	Annoussamy, 2019
ex4	PH-GRAM	missense		NM_000252.3:c.205C>T	NP_000243.1:p.(Arg69Cys)	M	Laporte, 2000	Annoussamy, 2019
ex4	PH-GRAM	missense		NM_000252.3:c.205C>T	NP_000243.1:p.(Arg69Cys)	M	Laporte, 2000	Annoussamy, 2019
ex4	PH-GRAM	missense		NM_000252.3:c.205C>T	NP_000243.1:p.(Arg69Cys)	Mo	Fattori, 2015
ex4	PH-GRAM	missense		NM_000252.3:c.205C>T	NP_000243.1:p.(Arg69Cys)	S	Annoussamy, 2019
ex4	PH-GRAM	missense		NM_000252.3:c.205C>T	NP_000243.1:p.(Arg69Cys)	S	Annoussamy, 2019
ex4	PH-GRAM	missense		NM_000252.3:c.205C>A	NP_000243.1:p.(Arg69Ser)	S	Biancalana, 2003
ex4	PH-GRAM	missense		NM_000252.3:c.208C>T	NP_000243.1:p.(Leu70Phe)	Mi	Biancalana, 2003
ex4	PH-GRAM	missense		NM_000252.3:c.208C>T	NP_000243.1:p.(Leu70Phe)	M	Laporte, 2000	Annoussamy, 2019
ex4	PH-GRAM	missense		NM_000252.3:c.208C>T	NP_000243.1:p.(Leu70Phe)	M	Laporte, 2000	Annoussamy, 2019
ex4	PH-GRAM	frameshift (deletion)		NM_000252.3:c.212_215del	NP_000243.1:p.(Tyr71*)	S	Laporte, 1997, Vincent, 1998
ex4	PH-GRAM	frameshift (deletion)		NM_000252.3:c.230del	NP_000243.1:p.(Thr77Argfs*5)	S	Biancalana, 2003
In4		splicing		NM_000252.3:c.231+1G>T		S	Oliveira, 2013
In4		intronic		NM_000252.3:c.232-26_232-23del		M/Mo	Al-Hashim, 2017
In4		intronic		NM_000252.3:c.232-26_232-23del		S	Annoussamy, 2019
In4		intronic		NM_000252.3:c.232-3C>A		S	Hermann, 2002
In4		splicing		NM_000252.3:c.232-1G>A		S	Annoussamy, 2019
ex5	PH-GRAM	missense		NM_000252.3:c.260T>C	NP_000243.1:p.(Leu87Pro)	M	Laporte, 2000
ex5	PH-GRAM	frameshift (insertion)		NM_000252.3:c.286_287insA	NP_000243.1:p.(Asp78Glufs*7)	S	Tanner, 1999
ex5	PH-GRAM	frameshift (insertion)		NM_000252.3:c.286_287insA	NP_000243.1:p.(Asp78Glufs*7)	S	Tanner, 1999
ex5	PH-GRAM	nonsense		NM_000252.3:c.321T>A	NP_000243.1:p.(Tyr107*)	S	de Gouyon, 1997
ex5	PH-GRAM	missense		NM_000252.3:c.323G>A	NP_000243.1:p.(Gly108Asp)	Mi	Oliveira, 2013
In5		intronic		NM_000252.3:c.342+5G>A		S	Oliveira, 2013
ex6	PH-GRAM	frameshift (insertion)		NM_000252.3:c.377_378insT	NP_000243.1:p.(Glu126Aspfs*10)	S	Biancalana, 2003
ex6	PH-GRAM	frameshift (deletion)		NM_000252.3:c.391del	NP_000243.1:p.(Arg131Glufs*24)	S	Oberle, 1998	Kress (2000?)
ex6	PH-GRAM	frameshift (deletion)		NM_000252.3:c.391del	NP_000243.1:p.(Arg131Glufs*24)	S	Oberle, 1998	Kress (2000?)
ex6	PH-GRAM	frameshift (deletion)		NM_000252.3:c.392_396del	NP_000243.1:p.(Arg131Asnfs*3)	S	de Gouyon, 1997
ex6	PH-GRAM	frameshift (deletion)		NM_000252.3:c.397_398del	NP_000243.1:p.(Met133Valfs*2)	S	Laporte, 1997
ex6	PH-GRAM	silent		NM_000252.3:c.417A>G	NP_000243.1:p.(Arg139=)	S	Biancalana, 2003
ex6	PH-GRAM	frameshift (deletion)		NM_000252.3:c.426del	NP_000243.1:p.(Leu144Trpfs*11)	S	Tanner, 1999
ex6	PH-GRAM	frameshift (deletion)		NM_000252.3:c.431del	NP_000243.1:p.(Leu144Argfs*11)	S	Chaudhari, 2009
ex6	PH-GRAM	frameshift (deletion)		NM_000252.3:c.438_439del	NP_000243.1:p.(His146Glnfs*10)	S	This study, 2023
In6		intronic		NM_000252.3:c.445-49_445-4del		S	Biancalana, 2003
In6		frameshift (insertion)		NM_000252.3:c.445-1_445insGAAA		S	Patient 19 in Herman et al. [1999]
ex7	PH-GRAM	frameshift (deletion/insertion)		NM_000252.3:c.461_477delinsAA	NP_000243.1:p.(Leu154*)	S	Laporte, 1997
ex7	PH-GRAM	frameshift (deletion)		NM_000252.3:c.465del	NP_000243.1:p.(Asn155Lysfs*29)	S	Hermann, 2002
ex7	PH-GRAM	nonsense		NM_000252.3:c.469G>T	NP_000243.1:p.(Glu157*)	S	Oliveira, 2013
ex7	PH-GRAM	frameshift (deletion)		NM_000252.3:c.469del	NP_000243.1:p.(Glu157Lysfs*29)	S	Hermann, 2002
ex7	PH-GRAM	frameshift (deletion)		NM_000252.3:c.473del	NP_000243.1:p.(Lys158Serfs*28)	S	Lee, 2013
ex7	RID	frameshift (deletion)		NM_000252.3:c.481del	NP_000243.1:p.(Val161Trpfs*25)	S	Tanner, 1999
ex7	RID	frameshift (duplication)		NM_000252.3:c.509_528dup	NP_000243.1:p.(Gly177Trpfs*16)	S	Oliveira, 2013
ex7	RID	frameshift (deletion)		NM_000252.3:c.520del	NP_000243.1:p.(Arg174Glyfs*12)	S	Annoussamy, 2019
ex7	RID	frameshift (insertion)		NM_000252.3:c.524_525insGG	NP_000243.1:p.(Gln176Glyfs*11)	S	Tsai, 2005
ex7	RID	nonsense		NM_000252.3:c.526C>T	NP_000243.1:p.(Gln176*)	S	Biancalana, 2003
ex7	RID	missense		NM_000252.3:c.527A>G	NP_000243.1:p.(Gln176Arg)	S	Nishikawa, 2019
In7		splicing		NM_000252.3:c.528+1G>A		S	Tsai, 2005	Laporte, 1997	Patient 18 in Herman et al. [1999]	Hermann, 2002	Biancalana, 2003
In7		splicing		NM_000252.3:c.528+1G>A		S	Tsai, 2005	Laporte, 1997	Patient 18 in Herman et al. [1999]	Hermann, 2002	Biancalana, 2003
In7		splicing		NM_000252.3:c.528+1G>A		S	Tsai, 2005	Laporte, 1997	Patient 18 in Herman et al. [1999]	Hermann, 2002	Biancalana, 2003
In7		splicing		NM_000252.3:c.528+1G>A		S	Tsai, 2005	Laporte, 1997	Patient 18 in Herman et al. [1999]	Hermann, 2002	Biancalana, 2003
In7		splicing		NM_000252.3:c.528+1G>A		S	Tsai, 2005	Laporte, 1997	Patient 18 in Herman et al. [1999]	Hermann, 2002	Biancalana, 2003
In7		splicing		NM_000252.3:c.529-1G>T		Mi	Vasli,2012
ex8	RID	frameshift (deletion)		NM_000252.3:c.534del	NP_000243.1:p.(Leu178Phefs*8)	S	Tsai, 2005
ex8	RID	missense		NM_000252.3:c.535C>T	NP_000243.1:p.(Pro179Ser)	M	Buj-Bello, 1999
ex8	RID	missense		NM_000252.3:c.535C>T	NP_000243.1:p.(Pro179Ser)	Mi	Hermann, 2002
ex8	RID	frameshift (insertion)		NM_000252.3:c.538_539insA	NP_000243.1:p.(Asn180Lysfs*10)	S	Laporte, 2000 (Novelli, 1999b)
ex8	RID	missense		NM_000252.3:c.540T>G	NP_000243.1:p.(Asn180Lys)	Mi (very)	Biancalana, 2003
ex8	RID	missense		NM_000252.3:c.550A>G	NP_000243.1:p.(Arg184Gly)	S	de Gouyon, 1997
ex8	RID	missense		NM_000252.3:c.551G>T	NP_000243.1:p.(Arg184Ile)	S	Biancalana, 2003
ex8	RID	missense		NM_000252.3:c.557C>T	NP_000243.1:p.(Thr186Ile)	?S	Hermann, 2002
ex8	RID	frameshift (deletion)		NM_000252.3:c.560_561del	NP_000243.1:p.(Phe187Tyrfs*2)	S	Laporte, 2000 (Häne and Schwartz, 1997)
ex8	RID	missense		NM_000252.3:c.566A>G	NP_000243.1:p.(Asn189Ser)	S	Laporte, 2000
ex8	RID	frameshift (deletion)		NM_000252.3:c.566del	NP_000243.1:p.(Asn189Ilefs*61)	S	Liechti-Gallati (2000?)
ex8	RID	deletion		NM_000252.3:c.567_569del	NP_000243.1:p.(Asn189del)	Mo	Annoussamy, 2019	Fattori, 2015
ex8	RID	deletion		NM_000252.3:c.567_569del	NP_000243.1:p.(Asn189del)	Mo	Annoussamy, 2019	Fattori, 2015
ex8	RID	missense		NM_000252.3:c.575A>G	NP_000243.1:p.(Tyr192Cys)	M	Annoussamy, 2019
ex8	RID	missense		NM_000252.3:c.575A>G	NP_000243.1:p.(Tyr192Cys)	M	Annoussamy, 2019
ex8	RID	missense		NM_000252.3:c.575A>G	NP_000243.1:p.(Tyr192Cys)	Mi	Tosch, 2010
ex8	RID	frameshift (deletion)		NM_000252.3:c.589_592del	NP_000243.1:p.(Tyr198Leufs*51)	S	de Gouyon, 1997	Laporte, 1997
ex8	RID	frameshift (deletion)		NM_000252.3:c.589_592del	NP_000243.1:p.(Tyr198Leufs*51)	S	de Gouyon, 1997	Laporte, 1997
ex8	RID	missense		NM_000252.3:c.590C>T	NP_000243.1:p.(Thr197Ile)	S	Laporte, 2000 (Novelli, 1999a)
ex8	RID	missense		NM_000252.3:c.590C>T	NP_000243.1:p.(Thr197Ile)	Mi	Fattori, 2015
ex8	RID	missense		NM_000252.3:c.590C>T	NP_000243.1:p.(Thr197Ile)	Mo	Fattori, 2015
ex8	RID	missense		NM_000252.3:c.592T>A	NP_000243.1:p.(Tyr198Asn)	S	de Gouyon, 1997
ex8	RID	frameshift (insertion)		NM_000252.3:c.593_594insA	NP_000243.1:p.(Tyr198*)	S	Hermann, 2002	Biancalana, 2003
ex8	RID	frameshift (insertion)		NM_000252.3:c.593_594insA	NP_000243.1:p.(Tyr198*)	S	Hermann, 2002	Biancalana, 2003
ex8	RID	nonsense		NM_000252.3:c.594C>A	NP_000243.1:p.(Tyr198*)	S	Tanner, 1999
ex8	RID	missense		NM_000252.3:c.595C>G	NP_000243.1:p.(Pro199Ala)	Mo	Nishikawa, 2019
ex8	RID	missense		NM_000252.3:c.595C>T	NP_000243.1:p.(Pro199Ser)	S	Annoussamy, 2019
ex8	RID	missense		NM_000252.3:c.596C>T	NP_000243.1:p.(Pro199Leu)	S	Tsai, 2005
ex8	RID	frameshift (insertion)		NM_000252.3:c.596_597insC	NP_000243.1:p.(Ala200Cysfs*12)	S	Oliveira, 2013
ex8	RID	frameshift (deletion)		NM_000252.3:c.601del	NP_000243.1:p.(Leu201Phefs*49)	S	Hermann, 2002
ex8	RID	missense		NM_000252.3:c.605T>C	NP_000243.1:p.(Leu202Ser)	S	Biancalana, 2003
ex8	RID	missense		NM_000252.3:c.614C>T	NP_000243.1:p.(Pro205Leu)	S	Tanner, 1999	Hermann, 2002	Biancalana, 2003	Tsai, 2005	Annoussamy, 2019
ex8	RID	missense		NM_000252.3:c.614C>T	NP_000243.1:p.(Pro205Leu)	S	Tanner, 1999	Hermann, 2002	Biancalana, 2003	Tsai, 2005	Annoussamy, 2019
ex8	RID	missense		NM_000252.3:c.614C>T	NP_000243.1:p.(Pro205Leu)	S	Tanner, 1999	Hermann, 2002	Biancalana, 2003	Tsai, 2005	Annoussamy, 2019
ex8	RID	missense		NM_000252.3:c.614C>T	NP_000243.1:p.(Pro205Leu)	S	Tanner, 1999	Hermann, 2002	Biancalana, 2003	Tsai, 2005	Annoussamy, 2019
ex8	RID	missense		NM_000252.3:c.614C>T	NP_000243.1:p.(Pro205Leu)	S	Tanner, 1999	Hermann, 2002	Biancalana, 2003	Tsai, 2005	Annoussamy, 2019
ex8	RID	missense		NM_000252.3:c.614C>T	NP_000243.1:p.(Pro205Leu)	S	Tanner, 1999	Hermann, 2002	Biancalana, 2003	Tsai, 2005	Annoussamy, 2019
ex8	RID	missense		NM_000252.3:c.614C>T	NP_000243.1:p.(Pro205Leu)	S	Tanner, 1999	Hermann, 2002	Biancalana, 2003	Tsai, 2005	Annoussamy, 2019
ex8	RID	missense		NM_000252.3:c.614C>T	NP_000243.1:p.(Pro205Leu)	S	Tanner, 1999	Hermann, 2002	Biancalana, 2003	Tsai, 2005	Annoussamy, 2019
ex8	RID	missense		NM_000252.3:c.614C>T	NP_000243.1:p.(Pro205Leu)	Mi	Tsai, 2005
ex8	RID	missense		NM_000252.3:c.637C>T	NP_000243.1:p.(Leu213Phe)	Mi	Oliveira, 2013
ex8	RID	frameshift (insertion)		NM_000252.3:c.649_650insG	NP_000243.1:p.(Ala217Glyfs*4)	S	Laporte, 1997
ex8	RID	missense		NM_000252.3:c.659G>C	NP_000243.1:p.(Arg220Thr)	S	Oliveira, 2013
ex8	RID	nonsense		NM_000252.3:c.664C>T	NP_000243.1:p.(Arg222*)	S	Biancalana, 2003	Tsai, 2005
ex8	RID	nonsense		NM_000252.3:c.664C>T	NP_000243.1:p.(Arg222*)	S	Biancalana, 2003	Tsai, 2005
ex8	RID	nonsense		NM_000252.3:c.664C>T	NP_000243.1:p.(Arg222*)	S	Biancalana, 2003	Tsai, 2005
ex8	RID	nonsense		NM_000252.3:c.670C>T	NP_000243.1:p.(Arg224*)	S	Tanner, 1999	Laporte, 1997	Liechti-Gallati (2000?)	Laporte, 1997	Annoussamy, 2019
ex8	RID	nonsense		NM_000252.3:c.670C>T	NP_000243.1:p.(Arg224*)	S	Tanner, 1999	Laporte, 1997	Liechti-Gallati (2000?)	Laporte, 1997	Annoussamy, 2019
ex8	RID	nonsense		NM_000252.3:c.670C>T	NP_000243.1:p.(Arg224*)	S	Tanner, 1999	Laporte, 1997	Liechti-Gallati (2000?)	Laporte, 1997	Annoussamy, 2019
ex8	RID	nonsense		NM_000252.3:c.670C>T	NP_000243.1:p.(Arg224*)	S	Tanner, 1999	Laporte, 1997	Liechti-Gallati (2000?)	Laporte, 1997	Annoussamy, 2019
ex8	RID	nonsense		NM_000252.3:c.670C>T	NP_000243.1:p.(Arg224*)	S	Tanner, 1999	Laporte, 1997	Liechti-Gallati (2000?)	Laporte, 1997	Annoussamy, 2019
ex8	RID	missense		NM_000252.3:c.674T>C	NP_000243.1:p.(Ile225Thr)	S	Tanner, 1999	Buj-Bello, 1999
ex8	RID	missense		NM_000252.3:c.674T>C	NP_000243.1:p.(Ile225Thr)	S	Tanner, 1999	Buj-Bello, 1999
ex8	RID	missense		NM_000252.3:c.676C>A	NP_000243.1:p.(Pro226Thr)	M/Mo	Biancalana, 2003
ex8	RID	missense		NM_000252.3:c.676C>T	NP_000243.1:p.(Pro226Ser)	Mo	Annoussamy, 2019
in8		splicing		NM_000252.3:c.678+1del		S	Laporte, 1997
in8		splicing		NM_000252.3:c.678+1G>C		S	Kress (2000?)
in8		splicing		NM_000252.3:c.678+1G>A		S	Tanner, 1999
in8		splicing		NM_000252.3:c.678+2T>A		S	Tanner, 1999
in8		splicing		NM_000252.3:c.679-2A>G		S	Tsai, 2005
in8		splicing		NM_000252.3:c.679-1G>A		S	Laporte, 1997, Tanner 1998
ex9	RID	missense		NM_000252.3:c.679G>A	NP_000243.1:p.(Val227Met)	M	Biancalana (2000?)
ex9	RID	missense		NM_000252.3:c.679G>A	NP_000243.1:p.(Val227Met)	Mi	Hermann, 2002
ex9	RID	missense		NM_000252.3:c.679G>A	NP_000243.1:p.(Val227Met)	S	Annoussamy, 2019
ex9	RID	missense		NM_000252.3:c.683T>C	NP_000243.1:p.(Leu228Phe)	Mo	Hermann, 2002
ex9	RID	missense		NM_000252.3:c.685T>C	NP_000243.1:p.(Ser229Phe)	S	Laporte, 2000
ex9	RID	frameshift (deletion)		NM_000252.3:c.685del	NP_000243.1:p.(Ser229Hisfs*21)	S	Tsai, 2005
ex9	RID	missense		NM_000252.3:c.688T>A	NP_000243.1:p.(Trp230Arg)	S	Tsai, 2005
ex9	RID	missense		NM_000252.3:c.688T>C	NP_000243.1:p.(Trp230Arg)	S	Nishikawa, 2019
ex9	RID	nonsense		NM_000252.3:c.689G>A	NP_000243.1:p.(Trp230*)	S	Buj-Bello, 1999
ex9	RID	missense		NM_000252.3:c.690G>T	NP_000243.1:p.(Trp230Cys)	S	Tanner, 1999
ex9	RID	missense		NM_000252.3:c.695A>G	NP_000243.1:p.(His232Arg)	S	Tanner, 1999
ex9	RID	missense		NM_000252.3:c.695A>G	NP_000243.1:p.(His232Arg)	Mo	Annoussamy, 2019
ex9	RID	frameshift (deletion)		NM_000252.3:c.701_702del	NP_000243.1:p.(Asn235*)	S	Biancalana, 2003
ex9	RID	frameshift (insertion)		NM_000252.3:c.709_710insA	NP_000243.1:p.(Thr237Asnfs*19)	S	Laporte, 1997
ex9	RID	frameshift (insertion)		NM_000252.3:c.713_714insG	NP_000243.1:p.(Ile239Hisfs*17)	S	Buj-Bello, 1999
ex9	RID	missense		NM_000252.3:c.719T>A	NP_000243.1:p.(Val232Glu)	S	Longo, 2016
ex9	RID	missense		NM_000252.3:c.721C>T	NP_000243.1:p.(Arg241Cys)	S	Tanner, 1999	Annoussamy, 2019
ex9	RID	missense		NM_000252.3:c.721C>T	NP_000243.1:p.(Arg241Cys)	S	Tanner, 1999	Annoussamy, 2019
ex9	RID	missense		NM_000252.3:c.721C>T	NP_000243.1:p.(Arg241Cys)	S	Tanner, 1999	Annoussamy, 2019
ex9	RID	missense		NM_000252.3:c.721C>T	NP_000243.1:p.(Arg241Cys)	M	Buj-Bello, 1999	Donelly, 1998	Laporte, 1997	Kress (2000?)	Liechti-Gallati (2000?)
ex9	RID	missense		NM_000252.3:c.721C>T	NP_000243.1:p.(Arg241Cys)	M	Buj-Bello, 1999	Donelly, 1998	Laporte, 1997	Kress (2000?)	Liechti-Gallati (2000?)
ex9	RID	missense		NM_000252.3:c.721C>T	NP_000243.1:p.(Arg241Cys)	M	Buj-Bello, 1999	Donelly, 1998	Laporte, 1997	Kress (2000?)	Liechti-Gallati (2000?)
ex9	RID	missense		NM_000252.3:c.721C>T	NP_000243.1:p.(Arg241Cys)	M	Buj-Bello, 1999	Donelly, 1998	Laporte, 1997	Kress (2000?)	Liechti-Gallati (2000?)
ex9	RID	missense		NM_000252.3:c.721C>T	NP_000243.1:p.(Arg241Cys)	M	Buj-Bello, 1999	Donelly, 1998	Laporte, 1997	Kress (2000?)	Liechti-Gallati (2000?)
ex9	RID	missense		NM_000252.3:c.721C>T	NP_000243.1:p.(Arg241Cys)	Mi	Hermann, 2002	Biancalana, 2003
ex9	RID	missense		NM_000252.3:c.721C>T	NP_000243.1:p.(Arg241Cys)	Mi	Hermann, 2002	Biancalana, 2003
ex9	RID	missense		NM_000252.3:c.721C>T	NP_000243.1:p.(Arg241Cys)	Mi	Hermann, 2002	Biancalana, 2003
ex9	RID	missense		NM_000252.3:c.721C>T	NP_000243.1:p.(Arg241Cys)	Mi	Hermann, 2002	Biancalana, 2003
ex9	RID	missense		NM_000252.3:c.721C>T	NP_000243.1:p.(Arg241Cys)	Mo	Annoussamy, 2019
ex9	RID	missense		NM_000252.3:c.722G>T	NP_000243.1:p.(Arg241Leu)	S
ex9	RID	nonsense		NM_000252.3:c.757C>T	NP_000243.1:p.(Arg253*)	S	De Luca, 1999	Biancalana, 2003	Fattori, 2015	Savarese, 2016
ex9	RID	nonsense		NM_000252.3:c.757C>T	NP_000243.1:p.(Arg253*)	S	De Luca, 1999	Biancalana, 2003	Fattori, 2015	Savarese, 2016
ex9	RID	nonsense		NM_000252.3:c.757C>T	NP_000243.1:p.(Arg253*)	S	De Luca, 1999	Biancalana, 2003	Fattori, 2015	Savarese, 2016
ex9	RID	nonsense		NM_000252.3:c.757C>T	NP_000243.1:p.(Arg253*)	S	De Luca, 1999	Biancalana, 2003	Fattori, 2015	Savarese, 2016
ex9	RID	frameshift (deletion/insertion)		NM_000252.3:c.765_767delinsGG	NP_000243.1:p.(Asp256Valfs*28)	S	Oliveira, 2013
ex9	RID	frameshift (deletion)		NM_000252.3:c.765del	NP_000243.1:p.(Asp256Metfs*28)	S	Laporte, 1997
ex9	RID	frameshift (insertion)		NM_000252.3:c.787_788insTT	NP_000243.1:p.(Ile264Leufs*21)	S	Buj-Bello, 1999
ex9	RID	missense		NM_000252.3:c.791T>G	NP_000243.1:p.(Ile264Ser)	S	Buj-Bello, 1999
ex9	RID	nonsense		NM_000252.3:c.796G>T	NP_000243.1:p.(Glu266*)	S	Buj-Bello, 1999
ex9	PTP/DSP	missense		NM_000252.3:c.836C>G	NP_000243.1:p.(Ala279Gly)	S	Hermann, 2002
ex9	PTP/DSP	frameshift (deletion)		NM_000252.3:c.836del	NP_000243.1:p.(Ala279Glufs*5)	M	Laporte, 1997
in9		splicing		NM_000252.3:c.867+1G>C		S	Kimura, 1998
in9		intronic		NM_000252.3:c.868-13T>A		S	Tosch, 2010
ex10	PTP/DSP	frameshift (insertion)		NM_000252.3:c.873_874insG	NP_000243.1:p.(Gly293Argfs*4)	S	Kress (2000?)
ex10	PTP/DSP	deletion		NM_000252.3:c.880_882del	NP_000243.1:p.(Gly294del)	M	Buj-Bello, 1999
ex10	PTP/DSP	frameshift (insertion)		NM_000252.3:c.885_886insT	NP_000243.1:p.(Glu296*)	S	Biancalana, 2003
ex10	PTP/DSP	frameshift (deletion)		NM_000252.3:c.928_935del	NP_000243.1:p.(Asp310*)	S	Tanner, 1999
ex10	PTP/DSP	missense		NM_000252.3:c.950T>G	NP_000243.1:p.(Met317Arg)	Mi	de Gouyon, 1997
ex10	PTP/DSP	frameshift (insertion)		NM_000252.3:c.969_970insA	NP_000243.1:p.(Val324Serfs*8)	S	Kress (2000?)	Hermann, 2002	Biancalana, 2003
ex10	PTP/DSP	frameshift (insertion)		NM_000252.3:c.969_970insA	NP_000243.1:p.(Val324Serfs*8)	S	Kress (2000?)	Hermann, 2002	Biancalana, 2003
ex10	PTP/DSP	frameshift (insertion)		NM_000252.3:c.969_970insA	NP_000243.1:p.(Val324Serfs*8)	S	Kress (2000?)	Hermann, 2002	Biancalana, 2003
ex10	PTP/DSP	frameshift (insertion)		NM_000252.3:c.1015_1016insT	NP_000243.1:p.(Ser339Phefs*39)	S	Hermann, 2002
ex10	PTP/DSP	missense		NM_000252.3:c.1037G>C	NP_000243.1:p.(Trp346Ser)	M	Biancalana (2000?)
ex10	PTP/DSP	missense		NM_000252.3:c.1038G>T	NP_000243.1:p.(Trp346Cys)	Mi	Biancalana, 2003
In10		splicing		NM_000252.3:c.1054-2A>G		S	Annoussamy, 2019
In10		splicing		NM_000252.3:c.1054-1G>T		S	Tanner, 1999
ex11	PTP/DSP	missense		NM_000252.3:c.1067G>A	NP_000243.1:p.(Gly356Glu)	S	Tsai, 2005
ex11	PTP/DSP	frameshift (insertion)		NM_000252.3:c.1083_1084insA	NP_000243.1:p.(Asp362Argfs*16)	S	Biancalana, 2003
ex11	PTP/DSP	frameshift (deletion)		NM_000252.3:c.1088_1089del	NP_000243.1:p.(Lys363Serfs*14)	S	Oliveira, 2013
ex11	PTP/DSP	nonsense		NM_000252.3:c.1097C>G	NP_000243.1:p.(Ser366*)	S	Tanner, 1999
ex11	PTP/DSP	missense		NM_000252.3:c.1120C>G	NP_000243.1:p.(His374Asp)	S	Kress (2000?)
ex11	PTP/DSP	missense		NM_000252.3:c.1127G>A	NP_000243.1:p.(Ser376Asn)	S	Laporte, 1996
ex11	PTP/DSP	frameshift (insertion)		NM_000252.3:c.1131_1132insGGAT	NP_000243.1:p.(Asp380Metfs*17)	S	Nishino, 1998
ex11	PTP/DSP	missense		NM_000252.3:c.1132G>A	NP_000243.1:p.(Gly378Arg)	S	Laporte, 1996	Buj-Bello, 1999	Hermann, 2002
ex11	PTP/DSP	missense		NM_000252.3:c.1132G>A	NP_000243.1:p.(Gly378Arg)	S	Laporte, 1996	Buj-Bello, 1999	Hermann, 2002
ex11	PTP/DSP	missense		NM_000252.3:c.1132G>A	NP_000243.1:p.(Gly378Arg)	S	Laporte, 1996	Buj-Bello, 1999	Hermann, 2002
ex11	PTP/DSP	missense		NM_000252.3:c.1133G>A	NP_000243.1:p.(Gly378Glu)	S	Laporte, 2000 (Häne and Schwartz, 1997)
ex11	PTP/DSP	nonsense		NM_000252.3:c.1137G>A	NP_000243.1:p.(Trp379*)	S	Kress (2000?)
ex11	PTP/DSP	nonsense		NM_000252.3:c.1150C>T	NP_000243.1:p.(Gln384*)	S	Savarese, 2016
ex11	PTP/DSP	missense		NM_000252.3:c.1160C>T	NP_000243.1:p.(Ser387Phe)	S	Tsai, 2005
ex11	PTP/DSP	missense		NM_000252.3:c.1166C>A	NP_000243.1:p.(Ala389Asp)	S	Biancalana, 2003
ex11	PTP/DSP	frameshift (insertion)		NM_000252.3:c.1179_1180insGTTG	NP_000243.1:p.(Asp394Valfs*3)	S	Laporte, 1997
ex11	PTP/DSP	missense		NM_000252.3:c.1190A>G	NP_000243.1:p.(Tyr397Cys)	S	de Gouyon, 1997	Laporte, 1997	Kress (2000?)	Hermann, 2002	Gangfuss, 2021
ex11	PTP/DSP	missense		NM_000252.3:c.1190A>G	NP_000243.1:p.(Tyr397Cys)	S	de Gouyon, 1997	Laporte, 1997	Kress (2000?)	Hermann, 2002	Gangfuss, 2021
ex11	PTP/DSP	missense		NM_000252.3:c.1190A>G	NP_000243.1:p.(Tyr397Cys)	S	de Gouyon, 1997	Laporte, 1997	Kress (2000?)	Hermann, 2002	Gangfuss, 2021
ex11	PTP/DSP	missense		NM_000252.3:c.1190A>G	NP_000243.1:p.(Tyr397Cys)	S	de Gouyon, 1997	Laporte, 1997	Kress (2000?)	Hermann, 2002	Gangfuss, 2021
ex11	PTP/DSP	missense		NM_000252.3:c.1190A>G	NP_000243.1:p.(Tyr397Cys)	S	de Gouyon, 1997	Laporte, 1997	Kress (2000?)	Hermann, 2002	Gangfuss, 2021
ex11	PTP/DSP	missense		NM_000252.3:c.1204G>A	NP_000243.1:p.(Gly402Arg)	S	Tanner, 1999	Hermann, 2002
ex11	PTP/DSP	missense		NM_000252.3:c.1204G>A	NP_000243.1:p.(Gly402Arg)	S	Tanner, 1999	Hermann, 2002
ex11	PTP/DSP	missense		NM_000252.3:c.1205G>T	NP_000243.1:p.(Gly402Val)	S	Nishino, 1998
ex11	PTP/DSP	missense		NM_000252.3:c.1210G>A	NP_000243.1:p.(Glu404Lys)	Mi	de Gouyon, 1997	Hoffjan, 2006	Fattori, 2015
ex11	PTP/DSP	missense		NM_000252.3:c.1210G>A	NP_000243.1:p.(Glu404Lys)	Mi	de Gouyon, 1997	Hoffjan, 2006	Fattori, 2015
ex11	PTP/DSP	missense		NM_000252.3:c.1210G>A	NP_000243.1:p.(Glu404Lys)	Mi	de Gouyon, 1997	Hoffjan, 2006	Fattori, 2015
ex11	PTP/DSP	missense		NM_000252.3:c.1210G>A	NP_000243.1:p.(Glu404Lys)	Mi (very)	Hoffjan, 2006
ex11	PTP/DSP	missense		NM_000252.3:c.1210G>A	NP_000243.1:p.(Glu404Lys)	M	Annoussamy, 2019
ex11	PTP/DSP	nonsense		NM_000252.3:c.1210G>T	NP_000243.1:p.(Glu404*)	M	Annoussamy, 2019
ex11	PTP/DSP	missense		NM_000252.3:c.1217T>C	NP_000243.1:p.(Leu406Pro)	S	de Gouyon, 1997
ex11	PTP/DSP	missense		NM_000252.3:c.1223A>C	NP_000243.1:p.(Gln408Pro)	S	Tsai, 2005
ex11	PTP/DSP	missense		NM_000252.3:c.1233G>C	NP_000243.1:p.(Trp411Cys)	M	Liechti-Gallati (2000?)
ex11	PTP/DSP	missense		NM_000252.3:c.1233G>T	NP_000243.1:p.(Trp411Cys)	M	Annoussamy, 2019
ex11	PTP/DSP	missense		NM_000252.3:c.1244G>T	NP_000243.1:p.(Gly415Val)	S	Tsai, 2005
ex11	PTP/DSP	missense		NM_000252.3:c.1247A>G	NP_000243.1:p.(His416Arg)	S	Oliveira, 2013
in11		splicing		NM_000252.3:c.1260+1G>C		S	Laporte, 1997
in11		intronic		NM_000252.3:c.1261-10A>G		S	Tsai, 2005	Gangfuss, 2021	Tanner, 1999	Laporte, 1997	Liechti-Gallati (2000?)	Buj-Bello, 1999	Watanabe, 1998	Nishino, 1998	Hermann, 2002	Biancalana, 2003	Fattori, 2015	de Gouyon, 1997
in11		intronic		NM_000252.3:c.1261-10A>G		S	Tsai, 2005	Gangfuss, 2021	Tanner, 1999	Laporte, 1997	Liechti-Gallati (2000?)	Buj-Bello, 1999	Watanabe, 1998	Nishino, 1998	Hermann, 2002	Biancalana, 2003	Fattori, 2015	de Gouyon, 1997
in11		intronic		NM_000252.3:c.1261-10A>G		S	Tsai, 2005	Gangfuss, 2021	Tanner, 1999	Laporte, 1997	Liechti-Gallati (2000?)	Buj-Bello, 1999	Watanabe, 1998	Nishino, 1998	Hermann, 2002	Biancalana, 2003	Fattori, 2015	de Gouyon, 1997
in11		intronic		NM_000252.3:c.1261-10A>G		S	Tsai, 2005	Gangfuss, 2021	Tanner, 1999	Laporte, 1997	Liechti-Gallati (2000?)	Buj-Bello, 1999	Watanabe, 1998	Nishino, 1998	Hermann, 2002	Biancalana, 2003	Fattori, 2015	de Gouyon, 1997
in11		intronic		NM_000252.3:c.1261-10A>G		S	Tsai, 2005	Gangfuss, 2021	Tanner, 1999	Laporte, 1997	Liechti-Gallati (2000?)	Buj-Bello, 1999	Watanabe, 1998	Nishino, 1998	Hermann, 2002	Biancalana, 2003	Fattori, 2015	de Gouyon, 1997
in11		intronic		NM_000252.3:c.1261-10A>G		S	Tsai, 2005	Gangfuss, 2021	Tanner, 1999	Laporte, 1997	Liechti-Gallati (2000?)	Buj-Bello, 1999	Watanabe, 1998	Nishino, 1998	Hermann, 2002	Biancalana, 2003	Fattori, 2015	de Gouyon, 1997
in11		intronic		NM_000252.3:c.1261-10A>G		S	Tsai, 2005	Gangfuss, 2021	Tanner, 1999	Laporte, 1997	Liechti-Gallati (2000?)	Buj-Bello, 1999	Watanabe, 1998	Nishino, 1998	Hermann, 2002	Biancalana, 2003	Fattori, 2015	de Gouyon, 1997
in11		intronic		NM_000252.3:c.1261-10A>G		S	Tsai, 2005	Gangfuss, 2021	Tanner, 1999	Laporte, 1997	Liechti-Gallati (2000?)	Buj-Bello, 1999	Watanabe, 1998	Nishino, 1998	Hermann, 2002	Biancalana, 2003	Fattori, 2015	de Gouyon, 1997
in11		intronic		NM_000252.3:c.1261-10A>G		S	Tsai, 2005	Gangfuss, 2021	Tanner, 1999	Laporte, 1997	Liechti-Gallati (2000?)	Buj-Bello, 1999	Watanabe, 1998	Nishino, 1998	Hermann, 2002	Biancalana, 2003	Fattori, 2015	de Gouyon, 1997
in11		intronic		NM_000252.3:c.1261-10A>G		S	Tsai, 2005	Gangfuss, 2021	Tanner, 1999	Laporte, 1997	Liechti-Gallati (2000?)	Buj-Bello, 1999	Watanabe, 1998	Nishino, 1998	Hermann, 2002	Biancalana, 2003	Fattori, 2015	de Gouyon, 1997
in11		intronic		NM_000252.3:c.1261-10A>G		S	Tsai, 2005	Gangfuss, 2021	Tanner, 1999	Laporte, 1997	Liechti-Gallati (2000?)	Buj-Bello, 1999	Watanabe, 1998	Nishino, 1998	Hermann, 2002	Biancalana, 2003	Fattori, 2015	de Gouyon, 1997
in11		intronic		NM_000252.3:c.1261-10A>G		S	Tsai, 2005	Gangfuss, 2021	Tanner, 1999	Laporte, 1997	Liechti-Gallati (2000?)	Buj-Bello, 1999	Watanabe, 1998	Nishino, 1998	Hermann, 2002	Biancalana, 2003	Fattori, 2015	de Gouyon, 1997
in11		intronic		NM_000252.3:c.1261-10A>G		S	Tsai, 2005	Gangfuss, 2021	Tanner, 1999	Laporte, 1997	Liechti-Gallati (2000?)	Buj-Bello, 1999	Watanabe, 1998	Nishino, 1998	Hermann, 2002	Biancalana, 2003	Fattori, 2015	de Gouyon, 1997
in11		intronic		NM_000252.3:c.1261-10A>G		S	Tsai, 2005	Gangfuss, 2021	Tanner, 1999	Laporte, 1997	Liechti-Gallati (2000?)	Buj-Bello, 1999	Watanabe, 1998	Nishino, 1998	Hermann, 2002	Biancalana, 2003	Fattori, 2015	de Gouyon, 1997
in11		intronic		NM_000252.3:c.1261-10A>G		S	Tsai, 2005	Gangfuss, 2021	Tanner, 1999	Laporte, 1997	Liechti-Gallati (2000?)	Buj-Bello, 1999	Watanabe, 1998	Nishino, 1998	Hermann, 2002	Biancalana, 2003	Fattori, 2015	de Gouyon, 1997
in11		intronic		NM_000252.3:c.1261-10A>G		S	Tsai, 2005	Gangfuss, 2021	Tanner, 1999	Laporte, 1997	Liechti-Gallati (2000?)	Buj-Bello, 1999	Watanabe, 1998	Nishino, 1998	Hermann, 2002	Biancalana, 2003	Fattori, 2015	de Gouyon, 1997
in11		intronic		NM_000252.3:c.1261-10A>G		S	Tsai, 2005	Gangfuss, 2021	Tanner, 1999	Laporte, 1997	Liechti-Gallati (2000?)	Buj-Bello, 1999	Watanabe, 1998	Nishino, 1998	Hermann, 2002	Biancalana, 2003	Fattori, 2015	de Gouyon, 1997
in11		intronic		NM_000252.3:c.1261-10A>G		S	Tsai, 2005	Gangfuss, 2021	Tanner, 1999	Laporte, 1997	Liechti-Gallati (2000?)	Buj-Bello, 1999	Watanabe, 1998	Nishino, 1998	Hermann, 2002	Biancalana, 2003	Fattori, 2015	de Gouyon, 1997
in11		intronic		NM_000252.3:c.1261-10A>G		S	Tsai, 2005	Gangfuss, 2021	Tanner, 1999	Laporte, 1997	Liechti-Gallati (2000?)	Buj-Bello, 1999	Watanabe, 1998	Nishino, 1998	Hermann, 2002	Biancalana, 2003	Fattori, 2015	de Gouyon, 1997
in11		intronic		NM_000252.3:c.1261-10A>G		S	Tsai, 2005	Gangfuss, 2021	Tanner, 1999	Laporte, 1997	Liechti-Gallati (2000?)	Buj-Bello, 1999	Watanabe, 1998	Nishino, 1998	Hermann, 2002	Biancalana, 2003	Fattori, 2015	de Gouyon, 1997
in11		intronic		NM_000252.3:c.1261-10A>G		S	Tsai, 2005	Gangfuss, 2021	Tanner, 1999	Laporte, 1997	Liechti-Gallati (2000?)	Buj-Bello, 1999	Watanabe, 1998	Nishino, 1998	Hermann, 2002	Biancalana, 2003	Fattori, 2015	de Gouyon, 1997
in11		intronic		NM_000252.3:c.1261-10A>G		S	Tsai, 2005	Gangfuss, 2021	Tanner, 1999	Laporte, 1997	Liechti-Gallati (2000?)	Buj-Bello, 1999	Watanabe, 1998	Nishino, 1998	Hermann, 2002	Biancalana, 2003	Fattori, 2015	de Gouyon, 1997
in11		intronic		NM_000252.3:c.1261-10A>G		S	Tsai, 2005	Gangfuss, 2021	Tanner, 1999	Laporte, 1997	Liechti-Gallati (2000?)	Buj-Bello, 1999	Watanabe, 1998	Nishino, 1998	Hermann, 2002	Biancalana, 2003	Fattori, 2015	de Gouyon, 1997
in11		intronic		NM_000252.3:c.1261-10A>G		S	Tsai, 2005	Gangfuss, 2021	Tanner, 1999	Laporte, 1997	Liechti-Gallati (2000?)	Buj-Bello, 1999	Watanabe, 1998	Nishino, 1998	Hermann, 2002	Biancalana, 2003	Fattori, 2015	de Gouyon, 1997
in11		intronic		NM_000252.3:c.1261-10A>G		S	Tsai, 2005	Gangfuss, 2021	Tanner, 1999	Laporte, 1997	Liechti-Gallati (2000?)	Buj-Bello, 1999	Watanabe, 1998	Nishino, 1998	Hermann, 2002	Biancalana, 2003	Fattori, 2015	de Gouyon, 1997
in11		intronic		NM_000252.3:c.1261-10A>G		S	Tsai, 2005	Gangfuss, 2021	Tanner, 1999	Laporte, 1997	Liechti-Gallati (2000?)	Buj-Bello, 1999	Watanabe, 1998	Nishino, 1998	Hermann, 2002	Biancalana, 2003	Fattori, 2015	de Gouyon, 1997
ex12	PTP/DSP	nonsense		NM_000252.3:c.1261C>T	NP_000243.1:p.(Arg421*)	S	de Gouyon, 1997	Tanner, 1999	Nishino, 1998	Hermann, 2002
ex12	PTP/DSP	nonsense		NM_000252.3:c.1261C>T	NP_000243.1:p.(Arg421*)	S	de Gouyon, 1997	Tanner, 1999	Nishino, 1998	Hermann, 2002
ex12	PTP/DSP	nonsense		NM_000252.3:c.1261C>T	NP_000243.1:p.(Arg421*)	S	de Gouyon, 1997	Tanner, 1999	Nishino, 1998	Hermann, 2002
ex12	PTP/DSP	nonsense		NM_000252.3:c.1261C>T	NP_000243.1:p.(Arg421*)	S	de Gouyon, 1997	Tanner, 1999	Nishino, 1998	Hermann, 2002
ex12	PTP/DSP	nonsense		NM_000252.3:c.1261C>T	NP_000243.1:p.(Arg421*)	S	de Gouyon, 1997	Tanner, 1999	Nishino, 1998	Hermann, 2002
ex12	PTP/DSP	nonsense		NM_000252.3:c.1261C>T	NP_000243.1:p.(Arg421*)	S	de Gouyon, 1997	Tanner, 1999	Nishino, 1998	Hermann, 2002
ex12	PTP/DSP	missense		NM_000252.3:c.1262G>A	NP_000243.1:p.(Arg421Gln)	S	de Gouyon, 1997	Laporte, 1997	Kress (2000?)	Liechti-Gallati (2000?)	Hermann, 2002	Biancalana, 2003	Longo, 2016
ex12	PTP/DSP	missense		NM_000252.3:c.1262G>A	NP_000243.1:p.(Arg421Gln)	S	de Gouyon, 1997	Laporte, 1997	Kress (2000?)	Liechti-Gallati (2000?)	Hermann, 2002	Biancalana, 2003	Longo, 2016
ex12	PTP/DSP	missense		NM_000252.3:c.1262G>A	NP_000243.1:p.(Arg421Gln)	S	de Gouyon, 1997	Laporte, 1997	Kress (2000?)	Liechti-Gallati (2000?)	Hermann, 2002	Biancalana, 2003	Longo, 2016
ex12	PTP/DSP	missense		NM_000252.3:c.1262G>A	NP_000243.1:p.(Arg421Gln)	S	de Gouyon, 1997	Laporte, 1997	Kress (2000?)	Liechti-Gallati (2000?)	Hermann, 2002	Biancalana, 2003	Longo, 2016
ex12	PTP/DSP	missense		NM_000252.3:c.1262G>A	NP_000243.1:p.(Arg421Gln)	S	de Gouyon, 1997	Laporte, 1997	Kress (2000?)	Liechti-Gallati (2000?)	Hermann, 2002	Biancalana, 2003	Longo, 2016
ex12	PTP/DSP	missense		NM_000252.3:c.1262G>A	NP_000243.1:p.(Arg421Gln)	S	de Gouyon, 1997	Laporte, 1997	Kress (2000?)	Liechti-Gallati (2000?)	Hermann, 2002	Biancalana, 2003	Longo, 2016
ex12	PTP/DSP	missense		NM_000252.3:c.1262G>A	NP_000243.1:p.(Arg421Gln)	S	de Gouyon, 1997	Laporte, 1997	Kress (2000?)	Liechti-Gallati (2000?)	Hermann, 2002	Biancalana, 2003	Longo, 2016
ex12	PTP/DSP	missense		NM_000252.3:c.1262G>A	NP_000243.1:p.(Arg421Gln)	M	Kress (2000?)
ex12	PTP/DSP	frameshift (duplication)		NM_000252.3:c.1264dupA	NP_000243.1:p.(Ile422Asnfs*5)	S	Annoussamy, 2019
ex12	PTP/DSP SID	nonsense		NM_000252.3:c.1318C>T	NP_000243.1:p.(Gln440*)	S	Oliveira, 2013
ex12	PTP/DSP SID	frameshift (deletion/insertion)		NM_000252.3:c.1319_1321delinsTA	NP_000243.1:p.(Gln440Leufs*24)	S	Oliveira, 2013
ex12	PTP/DSP SID	frameshift (deletion)		NM_000252.3:c.1328_1331del	NP_000243.1:p.(Asp443Valfs*20)	S	Oliveira, 2013
ex12	PTP/DSP SID	missense		NM_000252.3:c.1331G>A	NP_000243.1:p.(Cys444Tyr)	S	Tanner, 1999
ex12	PTP/DSP SID	frameshift (deletion)		NM_000252.3:c.1333_1345del	NP_000243.1:p.(Val445Glnfs*15)	S	Buj-Bello, 1999
ex12	PTP/DSP SID	nonsense		NM_000252.3:c.1338G>A	NP_000243.1:p.(Trp446*)	S	Tanner, 1999
ex12	PTP/DSP SID	nonsense		NM_000252.3:c.1346C>G	NP_000243.1:p.(Ser449*)	S	Tanner, 1999
in12		splicing		NM_000252.3:c.1353+1G>C		S	Tanner, 1999
in12		splicing		NM_000252.3:c.1353+1G>A		S	Tanner, 1999	Hermann, 2002
in12		splicing		NM_000252.3:c.1353+1G>A		S	Tanner, 1999	Hermann, 2002
in12		splicing		NM_000252.3:c.1354-1G>A		Mo	Patient 33 in Herman et al. [1999
ex13	PTP/DSP SID	frameshift (deletion/insertion)		NM_000252.3:c.1381_1382delinsTA	NP_000243.1:p.(Gln461*)	S	Fattori, 2015
ex13	PTP/DSP SID	insertion		NM_000252.3:c.1388_1389insN[376]	NP_000243.1:p.(Phe452_Gln489)del	S	Oliveira, 2013
ex13	PTP/DSP SID	missense		NM_000252.3:c.1405C>G	NP_000243.1:p.(His469Asp)	M/Mo	Zhao, 2018
ex13	PTP/DSP SID	missense		NM_000252.3:c.1406A>C	NP_000243.1:p.(His469Pro)	S	Laporte, 1997
ex13	PTP/DSP SID	missense		NM_000252.3:c.1409T>C	NP_000243.1:p.(Leu470Pro)	S	Biancalana, 2003
ex13	SID	nonsense		NM_000252.3:c.1420C>T	NP_000243.1:p.(Arg474*)	S	Laporte, 1997	Hermann, 2002	Fattori, 2015	Annoussamy, 2019
ex13	SID	nonsense		NM_000252.3:c.1420C>T	NP_000243.1:p.(Arg474*)	S	Laporte, 1997	Hermann, 2002	Fattori, 2015	Annoussamy, 2019
ex13	SID	nonsense		NM_000252.3:c.1420C>T	NP_000243.1:p.(Arg474*)	S	Laporte, 1997	Hermann, 2002	Fattori, 2015	Annoussamy, 2019
ex13	SID	nonsense		NM_000252.3:c.1420C>T	NP_000243.1:p.(Arg474*)	S	Laporte, 1997	Hermann, 2002	Fattori, 2015	Annoussamy, 2019
ex13	SID	nonsense		NM_000252.3:c.1420C>T	NP_000243.1:p.(Arg474*)	S	Laporte, 1997	Hermann, 2002	Fattori, 2015	Annoussamy, 2019
ex13	SID	nonsense		NM_000252.3:c.1420C>T	NP_000243.1:p.(Arg474*)	S	Laporte, 1997	Hermann, 2002	Fattori, 2015	Annoussamy, 2019		Funayama, 2019
ex13	SID	nonsense		NM_000252.3:c.1420C>T	NP_000243.1:p.(Arg474*)	S	Laporte, 1997	Hermann, 2002	Fattori, 2015	Annoussamy, 2019
ex13	SID	deletion		NM_000252.3:c.1432_1434del	NP_000243.1:p.(Phe478del)	S	Biancalana, 2003
ex13	SID	frameshift (deletion)		NM_000252.3:c.1433_1436del	NP_000243.1:p.(Phe478Tyrfs*23)	S	Tanner, 1999	Nishino, 1998
ex13	SID	frameshift (deletion)		NM_000252.3:c.1433_1436del	NP_000243.1:p.(Phe478Tyrfs*23)	S	Tanner, 1999	Nishino, 1998
ex13	SID	missense		NM_000252.3:c.1441A>T	NP_000243.1:p.(Asn481Tyr)	Mi	Biancalana, 2003
ex13	SID	frameshift (deletion)		NM_000252.3:c.1449_1449del	NP_000243.1:p.(Glu483Aspfs*19)	S	Tanner, 1999
ex13	SID	nonsense		NM_000252.3:c.1456C>T	NP_000243.1:p.(Arg486*)	S	Tanner, 1999	Patient 32 in Herman et al. [1999]	Tsai, 2005
ex13	SID	nonsense		NM_000252.3:c.1456C>T	NP_000243.1:p.(Arg486*)	S	Tanner, 1999	Patient 32 in Herman et al. [1999]	Tsai, 2005
ex13	SID	nonsense		NM_000252.3:c.1456C>T	NP_000243.1:p.(Arg486*)	S	Tanner, 1999	Patient 32 in Herman et al. [1999]	Tsai, 2005
ex13		frameshift (deletion)		NM_000252.3:c.1464_1467del	NP_000243.1:p.(Gln489Argfs*?)	S	Buj-Bello, 1999
in13		intronic		NM_000252.3:c.1467+5G>A		Mi	Tsai, 2005
in13		splicing		NM_000252.3:c.1467+1G>A		S	Hermann, 2002
in13		splicing		NM_000252.3:c.1467+1G>T		S	Fidani, 2011
in13		intronic		NM_000252.3:c.1468-577A>G		S	Fitzgerald, 2020
in13		intronic		NM_000252.3:c.1468-577A>G		S	Bryen, 2021
ex14		frameshift (deletion)		NM_000252.3:c.1481del	NP_000243.1:p.(Thr495Leufs*7)	Mi	Fattori, 2015
ex14		missense		NM_000252.3:c.1490C>A	NP_000243.1:p.(Ser497Tyr)	Mo	Annoussamy, 2019
ex14		missense		NM_000252.3:c.1495T>C	NP_000243.1:p.(Trp499Arg)	Mi	de Gouyon, 1997
ex14		missense		NM_000252.3:c.1496G>T	NP_000243.1:p.(Trp499Leu)	M	Annoussamy, 2019
ex14		missense		NM_000252.3:c.1505T>A	NP_000243.1:p.(Ile502Lys)	S	Annoussamy, 2019
ex14		missense		NM_000252.3:c.1505T>A	NP_000243.1:p.(Ile502Lys)	S	Annoussamy, 2019
ex14		frameshift (deletion)		NM_000252.3:c.1509_1510del	NP_000243.1:p.(Asn503Lysfs*2)	S	Oliveira, 2013
ex14		frameshift (deletion)		NM_000252.3:c.1519_1522del	NP_000243.1:p.(Glu507Asnfs*28)	S	Oliveira, 2013
ex14		deletion		NM_000252.3:c.1530_1541del	NP_000243.1:p.(Lys510_Tyr514delinsAsn)	S	Buj-Bello, 1999
ex14		nonsense		NM_000252.3:c.1549G>T	NP_000243.1:p.(Glu517*)	S	Liechti-Gallati (2000?)
ex14		nonsense		NM_000252.3:c.1558C>T	NP_000243.1:p.(Arg520*)	M	Kress (2000?)
ex14		nonsense		NM_000252.3:c.1558C>T	NP_000243.1:p.(Arg520*)	S	Savarese, 2016
ex14		nonsense		NM_000252.3:c.1558C>T	NP_000243.1:p.(Arg520*)	M	Kress (2000?)
ex14		frameshift (insertion)		NM_000252.3:c.1579_1580insC	NP_000243.1:p.(Ser527Thrfs*14)	S	Buj-Bello, 1999
ex14		frameshift (deletion)		NM_000252.3:c.1594_1594del	NP_000243.1:p.(Glu532Asnfs*4)	S	Tanner, 1999
ex14		missense		NM_000252.3:c.1600T>C	NP_000243.1:p.(Trp534Arg)	S	Oliveira, 2013
ex14		nonsense		NM_000252.3:c.1611C>G	NP_000243.1:p.(Tyr537*)	S	Biancalana, 2003
in14		intronic		NM_000252.3:c.1644+3_1644+6del		S	Tanner, 1999	Tosch, 2010
in14		intronic		NM_000252.3:c.1644+3_1644+6del		S	Tanner, 1999	Tosch, 2010
in14		intronic		NM_000252.3:c.1644+8_1644+11del		S	Biancalana, 2003
ex15		frameshift (deletion)		NM_000252.3:c.1789del	NP_000243.1:p.(His598Metfs*?)	Mi	Patient 35 in Herman et al. [1999]
ex1-13		Large deletion	NC_000023.11:g.(?_150568620)_(150660485_150663432)del		NP_000243.1:p.0?	S	Hu, 1996b, Laporte 1997
ex1-7		Large deletion	NC_000023.11:g.(?_150568620)_(150639027_150641268)del		NP_000243.1:p.0?	S	Hermann, 1999
ex1-6		Large deletion	NC_000023.11:g.(?_150568620)_(150619140_150638942)del		NP_000243.1:p.0?	S	Fattori, 2015
MTM1		Large deletion	NC_000023.11:g.(?_150568620)_(150673144_?)del			S	Hue, 1996b, Laporte, 1997	Bartsch, 1999	Biancalana, 2003	Tsai, 2005	Annoussamy, 2019
MTM1		Large deletion	NC_000023.11:g.(?_150568620)_(150673144_?)del			S	Hue, 1996b, Laporte, 1997	Bartsch, 1999	Biancalana, 2003	Tsai, 2005	Annoussamy, 2019
MTM1		Large deletion	NC_000023.11:g.(?_150568620)_(150673144_?)del			S	Hue, 1996b, Laporte, 1997	Bartsch, 1999	Biancalana, 2003	Tsai, 2005	Annoussamy, 2019
MTM1		Large deletion	NC_000023.11:g.(?_150568620)_(150673144_?)del			S	Hue, 1996b, Laporte, 1997	Bartsch, 1999	Biancalana, 2003	Tsai, 2005	Annoussamy, 2019
MTM1		Large deletion	NC_000023.11:g.(?_150568620)_(150673144_?)del			S	Hue, 1996b, Laporte, 1997	Bartsch, 1999	Biancalana, 2003	Tsai, 2005	Annoussamy, 2019
ex1		Large deletion	NC_000023.11:g.(?_150568620)_(?_150592604)del		NP_000243.1:p.?	S	Hermann, 1999, 2002, Tanner 1999
ex1		Large deletion	NC_000023.11:g.(?_150568620)_(?_150592604)del		NP_000243.1:p.?	S	Hermann, 1999, 2002, Tanner 1999
ex1		Large deletion	NC_000023.11:g.(?_150568620)_(?_150592604)del		NP_000243.1:p.?	S	Hermann, 1999, 2002, Tanner 1999
ex1		Large deletion	NC_000023.11:g.(?_150568620)_(?_150592604)del		NP_000243.1:p.?	S	Hermann, 1999, 2002, Tanner 1999
ex1		Large deletion	NC_000023.11:g.(?_150568620)_(?_150592604)del		NP_000243.1:p.?	S	Hermann, 1999, 2002, Tanner 1999
ex2		Large deletion	NC_000023.11:g.(150568663_150592604)_(X:150592678_150596497)del		NP_000243.1:p.0?	S	Tanner, 1999
ex2-6		Large deletion	NC_000023.11:g.(150568663_150592604)_(X:150619140_150638942)del		NP_000243.1:p.0?	S	Tanner, 1999
ex4		large deletion		NM_000252.3:c.(136+1_137-1)_(231+1_232-1)del	NP_000243.1:p.Asp46Glyfs*6	S	Tanner, 1999
ex5		Large deletion		NM_000252.3:c.(231+1_232-1)_(342+1_343-1)del	NP_000243.1:p.(Ser79_Asp115del)	S	Biancalana, 2003	Annoussamy, 2019
ex5		Large deletion		NM_000252.3:c.(231+1_232-1)_(342+1_343-1)del	NP_000243.1:p.(Ser79_Asp115del)	S	Biancalana, 2003	Annoussamy, 2019
ex5,6		Large deletion		NM_000252.3:c.(231+1_232-1)_(444+1_445-1)del	NP_000243.1:p.(Asp78_Leu148del)	S	de Gouyon, 1997
ex6-11		Large deletion		NM_000252.3:c.(342+1_343-1_(1260+1_1261-1)del	NP_000243.1:p.(Asp115_Ser420del)	S	de Gouyon, 1997
ex6		Large deletion		NM_000252.3:c.(342+1_343-1)_(444+1_445-1)del	NP_000243.1:p.(Asp115_Leu148del)	S	This study, 2023
ex8		Large deletion		NM_000252.3:c.(528+1_527-1)_(678+1_679-1)del	NP_000243.1:p.(Gly177_Pro226del)	S	Biancalana, 2003
ex9		Large deletion		NM_000252.3:c.(678+1_679-1)_(867+1_868-1)del	NP_000243.1:p.(Val227_Lys289del)	S	Tsai, 2005
ex10		Large deletion		NM_000252.3:c.(867+1_868-1)_(1053+1_1054-1)del	NP_000243.1:p.(Ala290_Lys351del)	S	Biancalana, 2003
ex11-13		Large deletion		NM_000252.3:c.(1053+1_1054-1)_(1467+1_1486-1)del	NP_000243.1:p.(Leu352_Gln489del)	S	This study, 2023
ex11-15		Large deletion	NC_000023.11:g.(150649902_150657820)_(150673144_?)del		NP_000243.1:p.?	S	Annoussamy, 2019
ex13		Large deletion		NM_000252.3:c.1354-26_1354+92del	NP_000243.1:p.(Phe452_Gln489del)	S	Hermann, 2002
ex15		Large deletion	NC_000023.11:g.(150663610_150671427)_(150673144_?)del		NP_000243.1:p.?	Mi	Tanner, 1999
Xq28		Large deletion	interstitial deletion at Xq28			S	Savarese, 2016

## Sheet: MISSENSE prediction
	Mutation	PredictSNP	MAPP	PhD-SNP	PolyPhen-1	PolyPhen-2	SIFT	SNAP
	M1R	0.51	-	0.68	0.59	0.43	0.79	0.61
	M1V	0.83	-	0.89	0.67	0.79	0.68	0.83
	E41A	0.87	-	0.68	0.74	0.81	0.79	0.56
	V49F	0.72	-	0.82	0.74	0.55	0.79	0.55
	R62I	0.65	0.65	0.59	0.67	0.79	0.75	0.56
	I65N	0.76	0.77	0.88	0.74	0.6	0.79	0.5
	T66R	0.87	0.63	0.89	0.74	0.81	0.79	0.89
	Y68D	0.87	0.48	0.88	0.74	0.81	0.79	0.85
	R69C	0.87	0.63	0.88	0.74	0.81	0.79	0.81
	R69S	0.87	0.63	0.86	0.74	0.81	0.79	0.56
	L70F	0.61	0.43	0.73	0.59	0.65	0.53	0.5
	L87P	0.76	0.76	0.88	0.74	0.81	0.79	0.55
	G108D	0.61	0.57	0.73	0.67	0.54	0.79	0.61
	Q176R	0.51	0.82	0.88	0.59	0.71	0.7	0.55
	P179S	0.74	0.74	0.55	0.67	0.68	0.45	0.83
	N180K	0.63	0.7	0.77	0.67	0.73	0.43	0.71
	R184G	0.87	0.46	0.88	0.59	0.4	0.53	0.72
	R184I	0.61	0.65	0.82	0.59	0.61	0.46	0.72
	T186I	0.87	0.62	0.77	0.59	0.41	0.79	0.56
	N189S	0.87	0.62	0.88	0.74	0.65	0.79	0.72
	Y192C	0.76	0.65	0.88	0.74	0.68	0.79	0.85
	T197I	0.72	0.88	0.82	0.74	0.81	0.79	0.77
	Y198N	0.87	0.86	0.88	0.74	0.81	0.79	0.81
	P199A	0.87	0.77	0.86	0.59	0.81	0.79	0.81
	P199L	0.87	0.77	0.86	0.74	0.81	0.79	0.81
	P199S	0.87	0.62	0.82	0.59	0.81	0.79	0.81
	P205L	0.76	0.77	0.86	0.74	0.81	0.79	0.55
	L213F	0.76	0.57	0.82	0.59	0.41	0.53	0.5
	R220T	0.87	0.77	0.82	0.74	0.81	0.79	0.89
	I225T	0.76	0.76	0.82	0.59	0.61	0.79	0.62
	P226S	0.87	0.86	0.88	0.74	0.65	0.53	0.81
	P226T	0.87	0.86	0.88	0.74	0.65	0.79	0.81
	V227M	0.76	0.66	0.73	0.74	0.65	0.79	0.5
	L228F	0.87	0.48	0.82	0.74	0.45	0.79	0.72
	S229F	0.87	0.62	0.68	0.74	0.81	0.79	0.72
	W230C	0.87	0.72	0.86	0.74	0.81	0.79	0.89
	W230R	0.87	0.86	0.88	0.74	0.81	0.79	0.89
	H232E	0.87	0.77	0.88	0.59	0.59	0.79	0.89
	H232R	0.87	0.57	0.88	0.59	0.5	0.79	0.85
	R241C	0.87	0.91	0.86	0.74	0.81	0.79	0.89
	R241L	0.87	0.84	0.86	0.74	0.81	0.79	0.56
	I264S	0.72	0.64	0.82	0.59	0.5	0.79	0.56
	A279G	0.72	0.7	0.82	0.59	0.4	0.79	0.62
	M317R	0.87	0.88	0.86	0.74	0.81	0.79	0.81
	W346C	0.87	0.91	0.82	0.74	0.81	0.79	0.62
	W346S	0.87	0.81	0.88	0.74	0.81	0.79	0.72
	G356E	0.87	0.88	0.82	0.74	0.65	0.79	0.62
	H374D	0.87	0.78	0.88	0.74	0.81	0.79	0.87
	S376N	0.87	0.56	0.68	0.74	0.65	0.79	0.62
	G378E	0.87	0.91	0.88	0.74	0.81	0.79	0.89
	G378R	0.87	0.84	0.82	0.74	0.81	0.79	0.87
	S387F	0.87	0.57	0.88	0.74	0.6	0.79	0.56
	A389D	0.87	0.88	0.88	0.74	0.65	0.79	0.72
	Y397C	0.61	0.65	0.82	0.74	0.47	0.79	0.55
	G402R	0.87	0.88	0.88	0.74	0.81	0.79	0.89
	G402V	0.87	0.91	0.88	0.74	0.81	0.79	0.85
	E404K	0.61	0.75	0.82	0.74	0.41	0.53	0.58
	L406P	0.87	0.86	0.82	0.74	0.81	0.79	0.89
	Q408P	0.76	0.78	0.88	0.59	0.63	0.79	0.72
	W411C	0.87	0.84	0.88	0.74	0.81	0.79	0.85
	G415V	0.87	0.86	0.88	0.74	0.81	0.79	0.85
	H416R	0.87	0.77	0.88	0.74	0.81	0.79	0.85
	R421Q	0.87	0.77	0.82	0.74	0.81	0.79	0.87
	C444Y	0.87	0.59	0.86	0.74	0.81	0.79	0.62
	H469D	0.72	0.59	0.88	0.59	0.69	0.53	0.89
	H469P	0.87	0.63	0.88	0.74	0.59	0.79	0.89
	L470P	0.87	0.63	0.82	0.74	0.81	0.79	0.72
	N481Y	0.87	0.77	0.88	0.74	0.81	0.79	0.85
	S497Y	0.87	0.63	0.82	0.74	0.81	0.79	0.81
	W499L	0.87	0.76	0.82	0.74	0.81	0.79	0.85
	W499R	0.87	0.88	0.86	0.74	0.81	0.79	0.87
	I502K	0.72	0.82	0.68	0.74	0.71	0.79	0.81
	W534R	0.87	0.88	0.88	0.74	0.81	0.79	0.89
